# Supplementary material for: Screening and Identification of HBV Epitopes Restricted by Multiple Prevalent HLA-A Allotypes
Source: PubMed Central journal article supplement (PMC9021956; doi:10.3389/fimmu.2022.847105), 2022-04-07
Supplement: DataSheet_1.pdf [file DataSheet_1.pdf]

**Supplementary Tables and Figures of the manuscript entitled “Screening and identification of HBV epitopes restricted by multiple prevalent HLA-A allotypes”, and authored by Yan Ding, et al.**

Table S1 Primers used in this study

| Primers | Sequence(5'-3')                                 | Anneal site              | Length |
|---------|-------------------------------------------------|--------------------------|--------|
| A1      | GAAACSGCCTCTGYGGGGAGAAGCAA                      | HLA-A intron 1:21-26     | 985bp  |
| A3      | TGTTGGTCCCAATTGTCTCCCCTC                        | HLA-A intron 3:66-89     |        |
| A2F     | AGCCGCGCCKGGASGAGGGTC                           | Exon 2 intron 2: 99-119  | 270bp  |
| A2R     | GGCCCGTCCGTGGGGGATGAG                           | Exon 2 intron 2: 37-57   |        |
| A3F     | GTTTCATTTTGRITKAGGCCA                           | Exon 3 intron 3: 150-171 | 276bp  |
| A3R     | TGTGGGAGGCCAGCCCGGGAGA                          | Exon 3 intron 3: 41-66   |        |
| AF      | tataggagacccaagctggATGGCCGTCATGGCGCCC           | HLA-A CDS                | 1098bp |
| AR      | ttttgtcgggccaagctTCACACTTTACAAGCTGTGA<br>GAGACA |                          |        |
| P-1F    | AGCTTGGGCCCCGAACAAA                             | pcDNATM3.1               | 5500bp |
| P-1R    | CCAGCTTGGGTCTCCCTATAGTG                         |                          |        |

Note: CDS, Coding sequence.

Table S2 *In silico* predicted 124 HBV CD8<sup>+</sup> T cell epitopes were synthesized for further validation

| HLA-A allotype | Epitope name | Protein | Virus genotype | Serotype    | start | end | Epitope sequence | SYFPEITHI  | BIMAS      | SVMHC       |        | IEDB          |        | NETMHC          | EPIJEN        |
|----------------|--------------|---------|----------------|-------------|-------|-----|------------------|------------|------------|-------------|--------|---------------|--------|-----------------|---------------|
|                |              |         |                |             |       |     |                  |            |            | SYFPEITHI   | MHCPEP | ANN           | SMM    |                 |               |
|                |              |         |                |             |       |     |                  | Score > 20 | Score > 10 | Score ≥ 0.5 |        | IC50 < 500 nM |        | Threshold < 2.0 | IC50 < 500 nM |
| A0201          | P6           | HBsAg   | A/B/C/D        | adw/adr/ayw | 262   | 270 | LLCLIFLLV        | 25         | 831.216    | 0.17        | 1      | 204.82        | 30.63  | 1.7             | 0.87          |
|                | P7           | HBsAg   | A/B/C/D        | adw/adr/ayw | 346   | 354 | WLSLLVPFV        | 26         | 4047.23    | 1           | 0.73   | 6.95          | 11.64  | 0.06            | 0.26          |
|                | P8           | HBsAg   | A/B/C/D        | adw/adr/ayw | 359   | 368 | GLSPTVWLSV       | 26         |            |             |        | 16.49         | 61.16  | 0.25            | 188.36        |
|                | P1           | HBeAg   | AD             |             | 47    | 56  | FLPSDFFPSV       | 24         | 2309.961   | 1           | 0.89   | 4.13          | 11.87  | 0.01            | 5.41          |
|                | P11          | HBeAg   | A/B/C/D        |             | 147   | 155 | YLVSFGVWI        | 23         | 1003       | 0.38        | 1      | 38.14         | 53.02  | 0.25            | 0.09          |
|                | P31          | HBeAg   | BC             |             | 47    | 56  | FLPSDFFPSI       | 24         | 2309.961   | 1           | 0.89   | 4.13          | 11.87  | 0.01            | 364.75        |
|                | P32          | HBeAg   | A/B/C/D        |             | 129   | 137 | LLWFHISCL        | 26         | 693.27     | 0.33        | 1      | 21.49         | 23.94  | 0.3             | 6.5           |
|                | P9           | HBpol   | A/C/D          |             | 442   | 450 | GLSRYVARL        | 28         |            |             |        | 89.06         | 106.93 | 1               | 0.87          |
|                | P10          | HBpol   | A/B/C/D        |             | 573   | 581 | FLLSLGIHL        | 24         | 363.59     |             | 1      | 9.41          | 15.85  | 0.1             | 0.11          |
|                | P33          | HBpol   | B              |             | 743   | 751 | KLIGTHNSV        | 28         | 243.43     | 0.88        | 0.92   | 41.52         | 65.33  | 0.6             | 1.34          |
|                | P34          | HBpol   | CA             |             | 743   | 751 | KLIGTDNSV        | 28         |            |             |        | 38.71         | 60.55  | 0.5             | 0.5           |
|                | P12          | HBx     | D              |             | 115   | 123 | CLFKDWEEL        | 23         | 65.841     | 0.06        | 0.47   | 153.91        | 152.09 | 1.4             | 2.18          |
|                | P35          | HBx     | A/B/C/D        |             | 92    | 100 | VLHKRTLGL        | 25         | 36.3       | 0.23        | 1.2    | 467.19        | 405.61 | 3               | 2.84          |
|                | P36          | HBx     | A/B/C/D        |             | 133   | 141 | VLGGCRHKL        | 26         | 36.3       | 0.7         | 0.45   | 1950.3        | 491.03 | 3.5             | 4.3           |
|                | P37          | HBx     | BA             |             | 102   | 110 | AMSTTDLEA        | 17         | 3.59       |             |        | 403.25        | 39.29  | 2.5             | 2.67          |
|                | A1101        | P13     | HBsAg          | C           | adr   | 306 | 315              | SMYPSCCCTK | 20         |             |        |               | 69.6   | 471.7           | 0.4           |
| P14            |              | HBsAg   | C              | adr/ayw     | 158   | 167 | ASPISSIFSR       | 22         |            |             |        | 37.46         | 146.5  | 0.25            | 1757.9        |
| P38            |              | HBsAg   | C              | adr/ayw     | 159   | 167 | SPISSIFSR        | 16         | 0.3        |             | 0.07   | 2738.5        | 284.64 | 0.04            | 7.13          |

|       |     |       |         |             |     |     |                |    |      |      |        |        |      |       |
|-------|-----|-------|---------|-------------|-----|-----|----------------|----|------|------|--------|--------|------|-------|
|       | P39 | HBsAg | B       | adw         | 159 | 167 | SAISSISSK      | 16 |      |      | 11.58  | 41.72  | 0.04 | 7.13  |
|       | P40 | HBsAg | B       | adw         | 190 | 198 | QAGFFSLTK      | 15 | 0.4  | 0.07 | 60.4   | 135.93 | 0.5  | 20.7  |
|       | P41 | HBsAg | CD      | adr/ayw/adw | 190 | 198 | QAGFFLLTR      | 20 | 10   |      | 1636.8 | 887.77 | 3.5  | 1.97  |
|       | P3  | HBeAg | BC      |             | 117 | 125 | YVNTNMGLK      | 23 | 2    | 0.12 | 69.82  | 60.72  | 0.5  | 2.24  |
|       | P4  | HBeAg | A/B/C/D |             | 148 | 156 | LVSFGVWIR      | 19 | 0.8  |      | 424.66 | 463.77 | 1.7  | 52.84 |
|       | P42 | HBeAg | A/B/C/D |             | 170 | 179 | STLPETTVVR     | 28 | 0.3  |      | 86.32  | 129.67 | 0.6  | /     |
|       | P43 | HBeAg | A/B/C/D |             | 133 | 141 | HISCLTFGR      | 14 | 0.24 |      | 204.4  | 314.99 | 1.1  | 21.33 |
|       | P15 | HBpol | D       |             | 118 | 127 | KVTKYLPLDK     | 25 | 12   |      | 130.94 | 105.65 | 0.8  | /     |
|       | P16 | HBpol | CD      |             | 671 | 679 | PTYKAFLCK      | 25 | 0.4  |      | 81.77  | 72.83  | 0.6  | 8.91  |
|       | P27 | HBpol | A/B/D   |             | 47  | 55  | NVSIPWTHK      | 20 | 2    |      | 224.51 | 360.83 | 1.2  | 3.33  |
|       | P44 | HBpol | AB      |             | 487 | 495 | YVSLMLLYK      | 24 | 4    |      | 11     | 16     | 0.03 | 6.97  |
|       | P45 | HBpol | C       |             | 487 | 495 | YVSLLLLYK      | 24 |      |      | 11.22  | 14.63  | 0.04 | 5.81  |
|       | P46 | HBpol | C       |             | 389 | 397 | VVDFSQFSR      | 18 | 0.8  | 0.06 | 110.19 | 208.11 | 1.3  | 6.14  |
|       | P17 | HBx   | AD      |             | 82  | 91  | TVNAHQILPK     | 26 | 4    |      | 15.6   | 15.7   | 0.07 | /     |
|       | P18 | HBx   | A/B/C/D |             | 104 | 113 | STTDLEAYFK     | 21 | 2    |      | 13.84  | 34.38  | 0.1  | 5     |
|       | P47 | HBx   | B       |             | 82  | 91  | TVNAHGMLPK     | 26 | 4    |      | 15.6   | 15.7   | 0.12 | /     |
|       | P48 | HBx   | C       |             | 82  | 91  | TVNAHQVLPK     | 26 |      |      | 16.51  | 19.05  | 0.08 | /     |
|       | P49 | HBx   | A/B/C/D |             | 105 | 113 | TTDLEAYFK      | 21 | 2    |      | 18.63  | 34.38  | 0.1  | 5     |
| A2402 | P19 | HBsAg | CD      | ayw         | 379 | 387 | LYSILSPFL      | 20 |      |      | 203.41 | 428.18 | 0.4  | 1.279 |
|       | P20 | HBsAg | ACD     | adr/ayw/adw | 258 | 266 | LFILLCLI       | 20 |      | 0.08 | 2069.3 | 692.84 | 1.9  | 1.499 |
|       | P50 | HBsAg | A/B/C/D | adr/ayw/adw | 247 | 256 | RWMCLRRFII     | 11 |      |      | 33.77  | 85.06  | 0.2  | 0.961 |
|       | P51 | HBsAg | A/B/C/D | adr/ayw/adw | 364 | 373 | VWLSVIWMM<br>W | 4  |      |      | 57.01  | 308.83 | 0.3  | 0.548 |
|       | P21 | HBeAg | D       |             | 52  | 60  | FFPSVRDLL      | 21 |      |      | 2044.1 | 2216.3 | 1.8  | 1.197 |

|       |     |       |         |             |     |     |           |    |     |      |        |        |      |        |
|-------|-----|-------|---------|-------------|-----|-----|-----------|----|-----|------|--------|--------|------|--------|
|       | P22 | HBeAg | D       |             | 116 | 124 | SYVNTNMGL | 21 |     | 0.32 | 1537   | 1338   | 1.2  | 1.322  |
|       | P23 | HBeAg | A/B/C/D |             | 146 | 154 | EYLVSFQVW | 13 | 9   |      | 341.06 | 330.85 | 0.6  | 1.573  |
|       | P52 | HBeAg | A/B/C/D |             | 131 | 139 | WFHISCLTF | 15 | 10  |      | 190.65 | 301.74 | 0.4  | 1.282  |
|       | P53 | HBeAg | ABC     |             | 116 | 124 | SYVNVNMGL | 21 |     | 0.32 | 1031.7 | 1149.3 | 1.2  | 1.404  |
|       | P24 | HBpol | A/B/C/D |             | 756 | 764 | KYTSFPWLL | 24 | 400 | 0.36 | 14.45  | 55.03  | 0.02 | 1.582  |
|       | P25 | HBpol | D       |             | 115 | 123 | FYPKVTKYL | 24 |     |      | 1031   | 1149   | 0.4  | 1.483  |
|       | P55 | HBpol | B       |             | 62  | 70  | LYSSTVPCF | 21 | 100 |      | 26.4   | 77.55  | 0.04 | 1.82   |
|       | P56 | HBpol | C       |             | 62  | 70  | LYSSTVPVF | 21 |     |      | 18.2   | 78.64  | 0.02 | 1.692  |
|       | P57 | HBpol | B       |             | 115 | 123 | FYPNVTKYL | 24 |     | 0.16 | 198.85 | 585.64 | 0.4  | 1.418  |
|       | P26 | HBx   | D       |             | 142 | 150 | VCAPAPCNF | 19 | 200 |      | 122.72 | 445.28 | 0.25 | 0.695  |
|       | P28 | HBx   | A/B/C/D |             | 132 | 140 | FVLGGCRHK |    |     | 0.46 | 843.43 | 569.9  | 1.8  |        |
| A3101 | P5  | HBsAg | CD      | ayw         | 335 | 343 | FLWEWASAR |    |     |      | 63.9   | 81.9   |      | 28.97  |
|       | P58 | HBsAg | A/B/C/D | adr/ayw/adw | 245 | 253 | GYRWMCLRR |    | 1.2 |      | 39.3   | 90.67  | 0.5  | 89.13  |
|       | P59 | HBsAg | A/B/C/D | adr/ayw/adw | 244 | 253 | PGYRWMCLR |    |     |      | 139.47 | 106.52 | 1.1  | 115.08 |
|       | P60 | HBpol | A/B/C/D |             | 188 | 196 | RTPSPRRRR |    |     |      | 34.12  | 30.44  | 0.4  | 54.7   |
|       | P61 | HBpol | A/B/C/D |             | 106 | 114 | RLKLIMPAR |    | 12  |      | 10.03  | 10.38  | 0.09 | 13.96  |
|       | P62 | HBpol | BC      |             | 580 | 588 | HLNPHKTKR |    |     |      | 9.86   | 17.55  | 0.09 | 21.04  |
|       | P63 | HBx   | A/B/C/D |             | 130 | 138 | KVFVLGGCR |    | 18  |      | 32.56  | 24.74  | 0.4  | 232.27 |
|       | P64 | HBx   | C       |             | 130 | 138 | MVFVLGGCR |    |     |      | 65.97  | 42.8   |      | 103.04 |
| A0206 | P2  | HBsAg | CD      | ayw         | 194 | 202 | FLLTRILTI |    |     |      | 23.51  | 29.01  |      | 25.7   |
|       | P66 | HBeAg | A/B/C/D |             | 1   | 9   | MQLFHLCLI |    |     |      | 4.4    | 4.34   | 0.04 | 162.93 |
|       | P67 | HBeAg | A/B/C/D |             | 47  | 55  | FLPSDFFPS |    |     |      | 6.8    | 26.95  | 0.09 |        |
|       | P68 | HBpol | A/B/C/D |             | 770 | 778 | WILRGTSFV |    |     |      | 14.49  | 27.58  | 0.3  | 8.65   |
|       | P69 | HBx   | BC      |             | 4   | 12  | RVCCQLDPA |    |     |      | 52.69  | 245.78 | 0.9  | 390.84 |

|       |      |       |         |             |     |     |                |        |        |      |       |
|-------|------|-------|---------|-------------|-----|-----|----------------|--------|--------|------|-------|
|       | P70  | HBx   | BCD     |             | 7   | 15  | CQLDPARDV      | 270.96 | 123.75 | 2.5  | 93.97 |
| A0207 | P71  | HBsAg | B       | adw         | 371 | 379 | MMWFWGPSL      | 281.4  | 876.31 | 0.15 |       |
|       | P72  | HBsAg | ACD     | adr/ayw/adw | 371 | 379 | MMWYWGPSL      | 6903   | 823.85 |      |       |
|       | P73  | HBsAg | A/B/C/D | adr/ayw/adw | 349 | 358 | LLVPFVQWFV     | 453.8  | 2687.8 | 0.01 |       |
|       | P74  | HBeAg | BC      |             | 88  | 97  | ILCWGELMNL     | 1136.6 | 3064.5 | 1.3  |       |
|       | P76  | HBpol | A/B/C/D |             | 524 | 532 | FLLAQFTSA      | 481.1  | 2400   |      |       |
| A3303 | P77  | HBsAg | A/B/C/D | adr/ayw/adw | 243 | 252 | CPGYRWMCLR     | 127.9  | 182.79 |      |       |
|       | P78  | HBsAg | C       | adr/ayw     | 335 | 343 | FLWEWASVR      | 38.5   | 69.92  |      |       |
|       | P79  | HBsAg | B       | adw         | 334 | 343 | KYLWGWASV<br>R | 131.8  | 142.04 |      |       |
|       | P80  | HBeAg | A/B/C/D |             | 77  | 85  | CSPHHTALR      | 85.1   | 121.36 |      |       |
|       | P81  | HBpol | A/B/C/D |             | 729 | 737 | ELLAACFAR      | 30.7   | 22.64  |      |       |
|       | P82  | HBpol | A/B/C/D |             | 1   | 9   | MPLSYQHFR      | 28     | 30.94  |      |       |
|       | P29  | HBpol | A/B/C/D |             | 504 | 513 | YSHPIILGFR     | 40.1   | 25.3   |      |       |
|       | P83  | HBx   | B/C/A   |             | 69  | 77  | CALRFTSAR      | 21.6   | 19.41  |      |       |
|       | P84  | HBx   | A/B/C/D |             | 64  | 72  | SSAGPCALR      | 31.7   | 58.28  |      |       |
|       | P122 | HBsAg | A       |             | 335 | 343 | YLWEWASVR      | 73.65  | 52.46  |      |       |
| A1102 | P101 | HBsAg | B/C/A   | adw/adr/ayw | 306 | 315 | SMFPSCCCTK     | 53.5   | 41.14  |      |       |
|       | P102 | HBsAg | A/C/D   | adw/adr/ayw | 189 | 198 | LQAGFFLLTR     | 398.5  | 510.44 |      |       |
|       | P103 | HBsAg | B       | adw         | 189 | 198 | LQAGFFSLTK     | 29     | 26.25  |      |       |
|       | P104 | HBeAg | B/C/D   |             | 12  | 21  | CSCPTVQASK     | 284.6  | 204.96 |      |       |
|       | P105 | HBpol | A/B/C/D |             | 665 | 674 | QAFTFSPTYK     | 11.4   | 784.45 |      |       |
|       | P106 | HBpol | A/B/C/D |             | 150 | 159 | TLWKAGILYK     | 18.9   | 776    |      |       |
| A3001 | P85  | HBsAg | A/B/C   | adw/adr/ayw | 341 | 349 | SVRFSWLSL      | 5.65   | 36.73  | 0.03 |       |

|       |      |       |         |             |     |     |                |      |        |        |       |       |
|-------|------|-------|---------|-------------|-----|-----|----------------|------|--------|--------|-------|-------|
|       | P86  | HBsAg | A/B/C/D | adw/adr/ayw | 250 | 258 | CLRRFIIFL      |      | 79.51  | 169.42 | 0.5   |       |
|       | P87  | HBeAg | A/B/C/D |             | 160 | 168 | AYRPPNAPI      |      | 7.31   | 75.33  | 0.05  |       |
|       | P88  | HBeAg | B/C     |             | 109 | 117 | ASRELVVSY      |      | 87.79  | 192.74 | 0.5   |       |
|       | P89  | HBpol | B/C     |             | 737 | 745 | RSRSGAKLI      |      | 10.35  | 47.63  | 0.08  |       |
|       | P90  | HBpol | C/D     |             | 737 | 745 | RSRSGANIL      |      | 11.71  | 83.17  | 0.04  |       |
|       | P91  | HBpol | B/C/A   |             | 829 | 837 | RVHFASPLH      |      | 11.28  | 79.61  | 0.08  |       |
|       | P92  | HBx   | B/C     |             | 94  | 102 | HKRTLGLSA      |      | 271.74 | 42.66  | 1     |       |
|       | P93  | HBx   | A/B/C/D |             | 128 | 136 | RLKVFVLGG      |      | 102.88 | 153.1  | 0.5   |       |
|       | P94  | HBx   | A/B/C   |             | 91  | 99  | KVLHKRTLGL     |      | 362.53 | 274.77 | 1.5   |       |
| A0203 | P95  | HBsAg | A/B/C/D | adw/adr/ayw | 271 | 280 | LLDYQGMLPV     |      | 5.72   | 20.5   | 0.125 |       |
|       | P96  | HBeAg | A/B/C/D |             | 168 | 177 | ILSTLPETTV     |      | 13.75  | 29.05  | 0.4   |       |
|       | P97  | HBeAg | B/C/D   |             | 8   | 17  | LIISCSCPTV     |      | 31.29  | 22.06  | 0.9   |       |
|       | P98  | HBpol | A/B/C/D |             | 525 | 533 | LLAQFTSAI      |      | 3.07   | 16.8   | 0.025 | 3.56  |
|       | P99  | HBpol | A/B/C/D |             | 524 | 533 | FLLAQFTSAI     |      | 3.34   | 14.01  | 0.03  |       |
|       | P100 | HBx   | A/B/C/D |             | 52  | 60  | HLSLRGLPV      |      | 20.45  | 59.42  | 0.6   | 1.67  |
| A0301 | P107 | HBsAg | B       | adw         | 371 | 380 | MMWFWGPSL<br>Y |      | 16.06  | 32.52  | 0.05  |       |
|       | P108 | HBsAg | A/C/D   | adw/adr/ayw | 371 | 380 | MMWYWGPSL<br>Y |      | 8.21   | 36.07  | 0.015 |       |
|       | P109 | HBeAg | B/C     |             | 117 | 125 | YVNVNMGLK      |      | 180.57 | 194    | 0.7   | 32.66 |
|       | P30  | HBeAg | A/B/C   |             | 125 | 133 | KIRQLLWFH      |      | 993.33 | 1034.6 | 2     | 3.4   |
|       | P54  | HBpol | B       |             | 156 | 164 | ILYKRESTR      | 1.27 | 68.73  | 126.9  | 0.4   | 44.26 |
|       | P65  | HBpol | C/D     |             | 656 | 664 | PLYACIQSK      | 0.93 | 82.66  | 60.65  | 0.4   | 14.32 |
|       | P110 | HBpol | A/B/C/D |             | 492 | 500 | LLYKTYGRK      |      | 8.19   | 24.14  | 0.02  | 6.52  |

|       |      |       |         |             |     |     |            |      |        |        |      |       |
|-------|------|-------|---------|-------------|-----|-----|------------|------|--------|--------|------|-------|
|       | P75  | HBx   | A/B/C/D |             | 132 | 140 | FVLGGCRHK  | 0.46 | 843.43 | 569.9  | 1.8  |       |
| A0101 | P123 | HBsAg | A/B     | adw         | 327 | 335 | PSSWAFKY   |      | 455.64 | 703.96 | 0.4  | 11.99 |
|       | P124 | HBeAg | B/C     |             | 49  | 57  | PSDFFPSIR  |      | 8570.2 | 1768.2 | 2.5  |       |
|       | P111 | HBeAg | BAD     |             | 59  | 67  | LLDTASALY  |      | 5.47   | 154.72 | 0.01 | 0.11  |
|       | P112 | HBpol | A/B/C/D |             | 427 | 435 | SLDVSAAFY  |      | 9.47   | 366.9  | 0.01 | 8.24  |
|       | P113 | HBpol | A/B/C/D |             | 808 | 816 | PTTGRTSLY  |      | 218.64 | 255.59 | 0.25 | 0.85  |
|       | P114 | HBx   | A/B/C   |             | 102 | 118 | AMSTTDLEAY |      | 149.77 | 884.71 | 0.2  |       |
| A2601 | P115 | HBsAg | A/B/C   | adw/adr/ayw | 17  | 25  | SVPNPLGFF  |      | 65.49  | 321.08 | 0.08 |       |
|       | P116 | HBsAg | A/B/C/D | adw/adr/ayw | 67  | 75  | FTPPHGGLL  |      | 535.92 | 710.58 | 0.4  |       |
|       | P117 | HBeAg | B/C/A   |             | 142 | 151 | ETVLEYLVSF |      | 13.47  | 589.78 | 0.03 |       |
|       | P118 | HBeAg | C       |             | 142 | 151 | ETVLEYLVSV |      | 419.55 | 3417.4 | 0.3  |       |
|       | P119 | HBpol | A/B/C/D |             | 726 | 735 | HTAELLAACF |      | 20.87  | 51.54  | 0.04 |       |
|       | P120 | HBpol | A/B/C   |             | 789 | 798 | DPSRGRGLY  |      | 271.67 | 1353.6 | 0.2  |       |
|       | P121 | HBx   | A/B/C/D |             | 104 | 112 | STTDLEAYF  |      | 707.89 | 725.45 | 0.4  |       |

Table S3 Characteristics of 56 HBV infected patients whose PBMCs displayed positive responses in IFN- $\gamma$  ELISPOT assay with epitope peptide pools

| Patient ID | Gender | Age (years) | Diagnose | Therapy | HLA-A genotype | HBsAg (IU/mL) | HBc-IgM  | Viral load (IU/mL) | ALT (IU/L) |
|------------|--------|-------------|----------|---------|----------------|---------------|----------|--------------------|------------|
| HBV1       | m      | 52          | LC       | NAs     | A*02:01/11:36  | 2310          | negative | $1.40 \times 10^6$ | 35.1       |
| HBV2       | f      | 63          | HCC      | no      | A*24:02        | >250          | positive | $1.90 \times 10^7$ | 211        |
| HBV3       | m      | 71          | CHB      | NAs     | A*02:01/32:01  | 97.08         | negative | $<5.0 \times 10^2$ | 56.2       |
| HBV4       | m      | 40          | CHB      | no      | A*02:06/11:01  | 15274         | negative | $3.90 \times 10^3$ | 41.2       |
| HBV5       | m      | 55          | LC       | NAs     | A*02:01/02:06  | 399           | negative | $<5.0 \times 10^2$ | 34.6       |
| HBV6       | m      | 60          | CHB      | NAs     | A*11:01/24:02  | 32.82         | n.d      | $<5.0 \times 10^2$ | 59.9       |
| HBV7       | m      | 54          | LC       | NAs     | A*24:02        | 192.27        | n.d      | $3.10 \times 10^3$ | 44.6       |
| HBV8       | f      | 70          | LC       | NAs     | A*11:01/30:01  | >250          | negative | $5.00 \times 10^3$ | 15.5       |
| HBV9       | f      | 34          | CHB      | no      | A*24:02/33:03  | 38157         | positive | n.d                | 87         |
| HBV10      | m      | 62          | CHB      | NAs     | A*02:07/24:02  | 1.2           | positive | $9.90 \times 10^2$ | 18         |
| HBV11      | f      | 72          | CHB      | NAs     | A*02:06/30:01  | 51.25         | positive | $2.20 \times 10^5$ | 51.5       |
| HBV12      | m      | 58          | LC       | NAs     | A*02:03/24:02  | 242           | n.d      | $<5.0 \times 10^2$ | 29         |
| HBV13      | m      | 28          | CHB      | no      | A*11:01/24:02  | 2649          | positive | $2.10 \times 10^7$ | 111.8      |
| HBV14      | m      | 50          | LC       | NAs     | A*24:02        | 6.43          | negative | $<5.0 \times 10^2$ | 20.6       |
| HBV15      | m      | 48          | CHB      | NAs     | A*11:01        | 36.24         | negative | $<5.0 \times 10^2$ | 61.3       |
| HBV16      | m      | 22          | CHB      | no      | A*02:03/11:01  | 697.7         | positive | $2.00 \times 10^6$ | 150.8      |
| HBV17      | m      | 56          | CHB      | NAs     | A*02:01/33:03  | 96.96         | negative | $4.70 \times 10^5$ | 567        |
| HBV18      | m      | 48          | LC       | NAs     | A*11:01/02:01  | 141.1         | n.d      | $<5.0 \times 10^2$ | 34.6       |
| HBV19      | m      | 47          | CHB      | no      | A*24:02/02:07  | 186.1         | positive | $<5.0 \times 10^2$ | 730        |



|       |   |    |     |     |                |          |             |                    |       |
|-------|---|----|-----|-----|----------------|----------|-------------|--------------------|-------|
| HBV20 | m | 49 | LC  | NAs | A*02:01        | 376      | lowpositive | $<5.0 \times 10^2$ | 24.6  |
| HBV21 | m | 32 | CHB | NAs | A*02:01/02:07  | 1544     | n.d         | $1.10 \times 10^4$ | 60.1  |
| HBV22 | m | 52 | HCC | NAs | A*24:02        | 126.98   | n.d         | $<5.0 \times 10^2$ | 6     |
| HBV23 | m | 70 | LC  | NAs | A*02:07/30:01  | 142.2    | n.d         | $<5.0 \times 10^2$ | 38.7  |
| HBV24 | m | 43 | LC  | NAs | A*11:01/24:63  | 1247     | negative    | $2.56 \times 10^2$ | 32.5  |
| HBV25 | m | 65 | HCC | NAs | A*02:01/24:02  | 758      | negative    | $<5.0 \times 10^2$ | 33.8  |
| HBV26 | f | 46 | HCC | NAs | A*24:02/26:01  | 402      | negative    | $<5.0 \times 10^2$ | 40.9  |
| HBV27 | m | 64 | LC  | NAs | A*11:01/31:01  | 756      | n.d         | $<5.0 \times 10^2$ | 10.9  |
| HBV28 | m | 34 | CHB | NAs | A*02:01        | 1.18     | n.d         | $2.93 \times 10^2$ | 78.8  |
| HBV29 | m | 27 | CHB | no  | A*01:01/02:06  | 670      | negative    | $6.70 \times 10^2$ | 258.9 |
| HBV30 | m | 68 | HCC | NAs | A*24:02/33:15  | 118      | negative    | $<5.0 \times 10^2$ | 14.2  |
| HBV31 | m | 39 | CHB | NAs | A*01:01/02:06  | $>52000$ | negative    | $9.80 \times 10^8$ | 516   |
| HBV32 | m | 28 | CHB | no  | A*24:02/02:07  | 4096     | negative    | $5.10 \times 10^2$ | 135.5 |
| HBV33 | m | 36 | CHB | NAs | A*24:02        | 5254     | negative    | $<5.0 \times 10^2$ | 22.2  |
| HBV34 | f | 56 | CHB | no  | A*02:06        | 581      | negative    | $<5.0 \times 10^2$ | 827   |
| HBV35 | m | 43 | CHB | NAs | A*24:02        | $>52000$ | negative    | $5.10 \times 10^7$ | 879   |
| HBV36 | f | 45 | CHB | NAs | A*24:02/24:109 | $>52000$ | n.d         | $1.60 \times 10^4$ | 189   |
| HBV37 | m | 64 | LC  | NAs | A*24:02/11:01  | 776      | positive    | $<5.0 \times 10^2$ | 65.7  |
| HBV38 | m | 62 | LC  | NAs | A*24:02/33:03  | 824      | negative    | $<5.0 \times 10^2$ | 11.2  |
| HBV39 | m | 70 | CHB | NAs | A*24*02        | 2373     | positive    | $6.30 \times 10^3$ | 265   |
| HBV40 | f | 43 | CHB | no  | A*24:02/02:07  | 51151    | negative    | $4.00 \times 10^8$ | 129   |
| HBV41 | m | 62 | LC  | NAs | A*0201/26:01   | 311      | positive    | $1.60 \times 10^4$ | 76.9  |
| HBV42 | m | 56 | HCC | NAs | A*24:02/02:07  | 108      | n.d         | $<5.0 \times 10^2$ | 28.7  |
| HBV43 | m | 35 | LC  | NAs | A*02:03/30:01  | 29.22    | negative    | $<5.0 \times 10^2$ | 96.7  |

|       |   |    |     |     |               |        |          |                    |      |
|-------|---|----|-----|-----|---------------|--------|----------|--------------------|------|
| HBV44 | m | 49 | CHB | NAs | A*2402        | 1238   | negative | $1.50 \times 10^7$ | 64.3 |
| HBV45 | m | 39 | LC  | NAs | A*11:01/24:02 | 41.2   | negative | n.d                | 23.4 |
| HBV46 | f | 36 | CHB | no  | A*02:01       | 0.09   | positive | $5.65 \times 10^2$ | 1338 |
| HBV47 | f | 56 | LC  | NAs | A*02:01/11:01 | 127    | positive | $1.80 \times 10^3$ | 24.4 |
| HBV48 | m | 36 | CHB | NAs | A*02:01/02:07 | 383    | negative | $<5.0 \times 10^2$ | 25.7 |
| HBV49 | f | 50 | LC  | NAs | A*02:01/24:02 | 558    | n.d      | $<5.0 \times 10^2$ | 10.3 |
| HBV50 | f | 65 | HCC | NAs | A*0201        | 105    | n.d      | $<5.0 \times 10^2$ | 48.8 |
| HBV51 | m | 27 | CHB | NAs | A*0203/0301   | 37537  | n.d      | $9.20 \times 10^7$ | 235  |
| HBV52 | m | 51 | CHB | no  | A*1101/0207   | 11226  | positive | $2.70 \times 10^7$ | 431  |
| HBV53 | f | 42 | CHB | no  | n.d           | 11441  | n.d      | $6.80 \times 10^7$ | 45.8 |
| HBV54 | f | 71 | HCC | NAs | n.d           | 1213   | negative | $<5.0 \times 10^2$ | 58   |
| HBV55 | f | 42 | AHB | NAs | A*0206/0201   | >52000 | positive | $2.30 \times 10^6$ | 828  |
| HBV56 | m | 39 | CHB | NAs | A*0206        | >52000 | positive | $8.10 \times 10^6$ | 444  |

Note: **f**, Female; **m**, Male; **NAs**, Nucleos(t)ide (acid) analogues; **n.d**, not detection.

Table S4 Bioinformatic analysis for the binding affinity of 45 validated HBV epitope peptides with corresponding HLA-A allotypes

| Epitope | HBV peptide | HLA  | PDB ID         | Bond Peptide | Resolution | $\Delta$ affinity (Kal/mol) | Prime Affinity (Kal/mol) | Binding Free Energy (Kal/mol) |
|---------|-------------|------|----------------|--------------|------------|-----------------------------|--------------------------|-------------------------------|
| P19     | LYSILSPFL   | 2402 | 5HGH           | RYPLTFGWCF   | 2.39 Å     | 14.01                       | -230.979                 |                               |
|         | LYSILSPFL   | 0201 | 5F9J           | YLSPIASPL    | 2.51 Å     | 29.88                       | -205.509                 |                               |
| P20     | IFILLLCLI   | 2402 | 5WWU           | LYKCLKREITF  | 2.79 Å     | 14.61                       | -228.759                 |                               |
| P38     | SPISSIFSR   | 0201 | 5HHM           | GILGLVFTL    | 2.5 Å      | 25.03                       | -214.158                 |                               |
|         | SPISSIFSR   | 1101 | 5WKH           | GTSGSPIINR   | 3.2Å       | 17.02                       | -207.058                 |                               |
| P39     | SAISSISSK   | 1101 | 5WKH           | GTSGSPIINR   | 3.2Å       | 28.51                       | -195.561                 |                               |
|         | SAISSISSK   | 0203 | 3OX8           | FLPSDFFPSV   | 2.16 Å     | 57.62                       | -184.133                 |                               |
| P40     | QAGFFSLTK   | 1101 | 5WKH           | GTSGSPIINR   | 3.2Å       | 22.94                       | -201.319                 |                               |
|         | QAGFFSLTK   | 3101 | 5WJL(Template) | GTSGSPIVNR   | 3.15Å      | 30.97                       | -194.895                 |                               |
| P41     | QAGFLLTR    | 1101 | 1Q94           | AIFQSSMTK    | 2.4Å       | -0.17                       | -202.268                 |                               |
|         | QAGFLLTR    | 1102 | 5WJL(Template) | GTSGSPIVNR   | 3.15Å      | 25.23                       | -204.629                 |                               |
| P51     | VWLSVIWMMW  | 2402 | 5WXD           | LYKCLKREMTF  | 3.3 Å      | -9.87                       | -243.243                 |                               |
|         | VWLSVIWMMW  | 0201 | 3I6K           | TLACFVLA AV  | 2.8 Å      | 39.08                       | -160.656                 |                               |
|         | VWLSVIWMMW  | 0207 | 3OXS           | FLPSDFFPSV   | 1.75 Å     | 96.17                       | -142.36                  |                               |
| P71     | MMWFWGPSL   | 2402 | 3QZW           | RYPLTFGWCF   | 2.8 Å      | 30.74                       | -224.833                 |                               |
|         | MMWFWGPSL   | 0207 | 3OXS           | FLPSDFFPSV   | 1.75 Å     | 29.83                       | -209.52                  |                               |
|         | MMWFWGPSL   | 0301 | 6O9C           | TTAPFLSGK    | 2.45 Å     | 18.96                       | -186.072                 |                               |
| P72     | MMWYWGPSL   | 0201 | 4WUU           | RMFPNAPYL    | 3.05 Å     | 29.53                       | -232.845                 |                               |
|         | MMWYWGPSL   | 0207 | 3OXS           | FLPSDFFPSV   | 1.75 Å     | 21.85                       | -217.501                 |                               |
|         | MMWYWGPSL   | 2402 | 2BCK           | VYGFVRA CL   | 2.8 Å      | 1.29                        | -203.137                 |                               |
| P77     | CPGYRWMCLR  | 3303 | 5WJL(Template) | GTSGSPIVNR   | 3.15Å      | -2.28                       | -219.146                 |                               |
| P78     | FLWEWASVR   | 0201 | 5F9J           | YLSPIASPL    | 2.51 Å     | -10.79                      | -245.795                 |                               |
|         | FLWEWASVR   | 3303 | 5WJL(Template) | GTSGSPIVNR   | 3.15Å      | -19.43                      | -244.411                 |                               |
|         | FLWEWASVR   | 2402 | 3QZW           | RYPLTFGWCF   | 2.8 Å      | 33.28                       | -222.293                 |                               |
| P95     | LLDYQGMLPV  | 203  | 3OX8           | FLPSDFFPSV   | 2.16 Å     | 36.06                       | -206.186                 |                               |
|         | LLDYQGMLPV  | 2402 | 4F7M           | LYASPQLEGF   | 2.4 Å      | 20.23                       | -189.639                 |                               |
| P103    | LQAGFFSLTK  | 0207 | 3OXS           | FLPSDFFPSV   | 1.75 Å     | 58.05                       | -181.332                 |                               |
|         | LQAGFFSLTK  | 2402 | 4F7M           | LYASPQLEGF   | 2.4 Å      | 31.7                        | -178.245                 |                               |
|         | LQAGFFSLTK  | 1102 | 5WJL(Template) | GTSGSPIVNR   | 3.15Å      | 65.2                        | -155.892                 |                               |

|      |                 |      |                |            |        |        |          |         |
|------|-----------------|------|----------------|------------|--------|--------|----------|---------|
| P108 | MMWYWGPSLY      | 2402 | 5HGD           | RFPLTFGWCF | 2.07 Å | 16.42  | -227.601 |         |
|      | MMWYWGPSLY      | 0301 | 3RL2           | QVPLRPMTYK | 2.39 Å | 7.96   | -212.347 |         |
|      | MMWYWGPSLY      | 0207 | 3OXS           | FLPSDFFPSV | 1.75 Å | 39.17  | -200.201 |         |
| P31  | FLPSDFFPSI      | 0207 | 3OXS           | FLPSDFFPSV | 1.75 Å | -3.52  | -234.402 |         |
|      | FLPSDFFPSI      | 0201 | 5FDW           | YLSPIASPLL | 2.7 Å  | 6.22   | -210.992 | -91.356 |
|      | FLPSDFFPSI      | 1101 | 5GRD           | SSCSSCPLSK | 1.8 Å  | /      | /        | -81.106 |
| P42  | STLPETTVVR      | 1101 | 5WKF           | GTSGSPIVNR | 2.95Å  | 23.62  | -232.694 |         |
|      | STLPETTVVR      | 0207 | 3OXS           | FLPSDFFPSV | 1.75 Å | 50.86  | -188.512 |         |
| P52  | WFHISCLTF (HIE) | 2402 | 3I6L           | QFKDNVILL  | 2.4 Å  | -16.95 | -229.136 |         |
|      | WFHISCLTF (HIE) | 0207 | 3OXS           | FLPSDFFPSV | 1.75 Å | 25.2   | -214.149 |         |
|      | WFHISCLTF (HIE) | 0201 | 5SWQ           | CVNGSCFTV  | 2.0 Å  | 1.38   | -194.168 |         |
|      | WFHISCLTF (HIP) | 2402 | 3I6L           | QFKDNVILL  | 2.4 Å  | -12.31 | -224.493 |         |
|      | WFHISCLTF (HIP) | 0207 | 3OXS           | FLPSDFFPSV | 1.75 Å | 25.2   | -219.55  |         |
|      | WFHISCLTF (HIP) | 0201 | 5SWQ           | CVNGSCFTV  | 2.0 Å  | -7.94  | -203.491 |         |
|      | WFHISCLTF (HID) | 0207 | 3OXS           | FLPSDFFPSV | 1.75 Å | 24.87  | -214.484 |         |
|      | WFHISCLTF (HID) | 2402 | 3QZW           | RYPLTFGWCF | 2.8 Å  | 41.34  | -214.233 |         |
|      | WFHISCLTF (HID) | 201  | 1DUZ           | LLFGYPVYV  | 1.8 Å  | 9.25   | -205.066 |         |
| P53  | SYVNVNMGL       | 2402 | 3QZW           | RYPLTFGWCF | 2.8 Å  | 28.48  | -230.186 |         |
|      | SYVNVNMGL       | 0207 | 3OXS           | FLPSDFFPSV | 1.75 Å | 452.77 | -213.42  |         |
| P74  | ILCWGELMNL      | 0207 | 3OXS           | FLPSDFFPSV | 1.75 Å | 37.23  | -206.901 |         |
|      | ILCWGELMNL      | 2402 | 4F7M           | LYASPQLEGF | 2.4 Å  | -6.42  | -205.001 |         |
| P88  | ASRELVVSY       | 0201 | 3MGT           | KLYQNPTTYI | 2.2 Å  | 9.63   | -205.329 |         |
|      | ASRELVVSY       | 3001 | 6J1W           | AIFQSSMTK  | 1.5 Å  | 27.34  | -192.458 |         |
|      | ASRELVVSY       | 0206 | 3OXR           | FLPSDFFPSV | 1.7 Å  | 48.17  | -188.493 |         |
| P118 | ETVLEYLVSV      | 2601 | 6AT9(Template) | AQDIYRASYY | 2.95 Å | 76.53  | -109.727 | -90.805 |
|      | ETVLEYLVSV      | 1101 | 5GRD           | SSCSSCPLSK | 1.8Å   | /      | /        | 93.877  |
|      | ETVLEYLVSV      | 0201 | 3UTQ           | ALWGPDAAA  | 1.67 Å | -15.25 | -211.162 | -76.755 |
| P96  | ILSTLPETTV      | 0201 | 5YXU           | KLVALGINAV | 2.7 Å  | 18.05  | -243.602 |         |
|      | ILSTLPETTV      | 0203 | 3OX8           | FLPSDFFPSV | 2.16 Å | 49.55  | -192.699 |         |
| P111 | LLDTASALY       | 0101 | 6AT9           | AQDIYRASYY | 2.95 Å | 6.27   | -222.514 |         |
|      | LLDTASALY       | 1102 | 5WJL(Template) | GTSGSPIVNR | 3.15Å  | 23.87  | -205.293 |         |
| P16  | PTYKAFLCK       | 1101 | 5WJN           | GTSGSPIINR | 2.85Å  | 8.94   | -226.19  |         |
|      | PTYKAFLCK       | 0206 | 3OXR           | FLPSDFFPSV | 1.7 Å  | 18.47  | -218.295 |         |
| P25  | FYPKVTKYL       | 2402 | 5HGH           | RYPLTFGWCF | 2.39 Å | 5.55   | -240.69  |         |

|      |                  |      |                |            |        |        |          |         |
|------|------------------|------|----------------|------------|--------|--------|----------|---------|
|      | FYPKVTKYL        | 1101 | 1QVO           | QVPLRPMTYK | 2.22Å  | 115.94 | -103.825 |         |
| P33  | KLIGHTNSV (HID)  | 0201 | 1A07           | LLFGYPVYV  | 2.6 Å  | 66.41  | -224.859 |         |
|      | KLIGHTNSV (HID)  | 0203 | 3OX8           | FLPSDFFPSV | 2.16 Å | 47.29  | -194.958 |         |
|      | KLIGHTNSV (HID)  | 1101 | 1X7Q           | KTFPPTEPK  | 1.45Å  | 39.57  | -190.801 |         |
|      | KLIGHTNSV (HIP)  | 0203 | 3OX8           | FLPSDFFPSV | 2.16 Å | 35.56  | -206.683 |         |
|      | KLIGHTNSV (HIP)  | 1101 | 1X7Q           | KTFPPTEPK  | 1.45Å  | 30.02  | -200.345 |         |
|      | KLIGHTNSV (HIP)  | 0201 | 1QEW           | FLWGPRALV  | 2.2 Å  | 26     | -194.847 |         |
|      | KLIGHTNSV (HIE)  | 0203 | 3OX8           | FLPSDFFPSV | 2.16 Å | 37.2   | -205.05  |         |
|      | KLIGHTNSV (HIE)  | 1101 | 1X7Q           | KTFPPTEPK  | 1.45Å  | 30.16  | -200.209 |         |
|      | KLIGHTNSV (HIE)  | 0201 | 1QEW           | FLWGPRALV  | 2.2 Å  | 31.3   | -189.542 |         |
| P34  | KLIGTDNSV        | 0201 | 1A07           | LLFGYPVYV  | 2.6 Å  | 68.06  | -223.205 |         |
|      | KLIGTDNSV        | 0203 | 3OX8           | FLPSDFFPSV | 2.16 Å | 55.46  | -186.788 |         |
| P55  | LYSSTVPCF        | 2402 | 3QZW           | RYPLTFGWCF | 2.8 Å  | 30.13  | -224.354 |         |
|      | LYSSTVPCF        | 3303 | 5WJL(Template) | GTSGSPIVNR | 3.15 Å | 23.65  | -201.253 | -62.735 |
|      | LYSSTVPCF        | 0201 | 1A07           | LLFGYPVYV  | 2.6 Å  | 95.69  | -195.528 |         |
| P56  | LYSSTVPVF        | 2402 | 5HGH           | RYPLTFGWCF | 2.39 Å | 32.76  | -215.287 |         |
|      | LYSSTVPVF        | 0207 | 3OXS           | FLPSDFFPSV | 1.75 Å | 55.55  | -182.984 |         |
|      | LYSSTVPVF        | 0201 | 4WUU           | RMFPNAPYL  | 3.05 Å | 83.19  | -180.441 |         |
| P76  | FLLAQFTSA        | 0203 | 3OX8           | FLPSDFFPSV | 2.16 Å | 14.71  | -224.393 |         |
|      | FLLAQFTSA        | 0207 | 3OXS           | FLPSDFFPSV | 1.75 Å | 18.52  | -221.367 |         |
| P89  | RSRSGAKLI        | 0201 | 4WUU           | RMFPNAPYL  | 3.05 Å | 29.69  | -236.247 |         |
|      | RSRSGAKLI        | 0206 | 3OXR           | FLPSDFFPSV | 1.7 Å  | 25.52  | -212.082 |         |
|      | RSRSGAKLI        | 3001 | 6J1W           | AIFQSSMTK  | 1.5 Å  | 29.76  | -190.118 |         |
| P90  | RSRSGANIL        | 0201 | 4WUU           | RMFPNAPYL  | 3.05 Å | 28.17  | -236.333 |         |
|      | RSRSGANIL        | 3001 | 6J1W           | AIFQSSMTK  | 1.5 Å  | 20.4   | -199.485 |         |
| P98  | LLAQFTSAI        | 0203 | 3OX8           | FLPSDFFPSV | 2.16 Å | 47.89  | -193.325 |         |
| P106 | TLWKAGILYK       | 0301 | 3RL2           | QVPLRPMTYK | 2.39 Å | 21.95  | -198.361 |         |
|      | TLWKAGILYK       | 2402 | 3QZW           | RYPLTFGWCF | 2.8 Å  | 64.92  | -190.629 |         |
|      | TLWKAGILYK       | 1102 | 5WJL(Template) | GTSGSPIVNR | 3.15Å  | 49.1   | -172.168 |         |
| P119 | HTAELLAACF (HIP) | 2402 | 4F7M           | LYASPQLEGF | 2.4 Å  | 18.23  | -190.796 |         |
|      | HTAELLAACF (HIP) | 2601 | 6AT9(Template) | AQDIYRASYY | 2.95 Å | 61.74  | -124.521 |         |
|      | HTAELLAACF (HID) | 2402 | 4F7M           | LYASPQLEGF | 2.4 Å  | 18.91  | -190.117 |         |
|      | HTAELLAACF (HID) | 2601 | 6AT9(Template) | AQDIYRASYY | 2.95 Å | 69.62  | -116.639 |         |
|      | HTAELLAACF (HIE) | 2402 | 4F7M           | LYASPQLEGF | 2.4 Å  | 20.01  | -189.014 |         |

|     |                   |      |                |            |        |        |          |         |
|-----|-------------------|------|----------------|------------|--------|--------|----------|---------|
|     | HTAELLAACF (HIE)  | 2601 | 6AT9(Template) | AQDIYRASYY | 2.95 Å | 56.89  | -129.266 |         |
| P17 | TVNAHQILPK        | 1101 | 1QVO           | QVPLRPMTYK | 2.22Å  | /      | /        | -91.657 |
|     | TVNAHQILPK        | 3001 | 6JIW           | AIFQSSMTK  | 1.5Å   | /      | /        | -86.233 |
| P18 | STTDLEAYFK        | 0201 | 1I4F           | GVYDGREHTV | 1.4 Å  | 10.56  | -190.192 |         |
|     | STTDLEAYFK        | 1101 | 2HN7           | AIMPARFYPK | 1.6Å   | 30.65  | -178.581 |         |
|     | STTDLEAYFK        | 0206 | 3OXR           | FLPSDFFPSV | 1.7 Å  | 85.35  | -151.319 |         |
| P26 | VCAPAPCNF         | 2402 | 4F7M           | LYASPQLEGF | 2.4 Å  | 13.41  | -195.616 |         |
| P47 | TVNAHGNNLPK (HIP) | 0201 | 5YXN           | KLVALGINAV | 2.03 Å | 18.4   | -244.049 |         |
|     | TVNAHGNNLPK (HIP) | 1101 | 2HN7           | AIMPARFYPK | 1.6Å   | 23.84  | -185.088 |         |
|     | TVNAHGNNLPK (HIP) | 0301 | 3RL2           | QVPLRPMTYK | 2.39 Å | 53.71  | -164.219 |         |
|     | TVNAHGNNLPK (HIE) | 0201 | 5YXU           | KLVALGINAV | 2.7 Å  | 17.58  | -236.718 |         |
|     | TVNAHGNNLPK (HIE) | 1101 | 1QVO           | QVPLRPMTYK | 2.22Å  | 36.96  | -180.271 |         |
|     | TVNAHGNNLPK (HIE) | 0301 | 3RL2           | QVPLRPMTYK | 2.39 Å | 60.05  | -157.886 |         |
|     | TVNAHGNNLPK (HID) | 0201 | 5YXN           | KLVALGINAV | 2.03 Å | 31.83  | -230.622 |         |
|     | TVNAHGNNLPK (HID) | 1101 | 1QVO           | QVPLRPMTYK | 2.22Å  | 33.04  | -184.185 |         |
|     | TVNAHGNNLPK (HID) | 0301 | 3RL2           | QVPLRPMTYK | 2.39 Å | 59.57  | -158.362 |         |
| P48 | TVNAHQVLPK (HID)  | 1101 | 1QVO           | QVPLRPMTYK | 2.22Å  | 23.27  | -193.959 |         |
|     | TVNAHQVLPK (HIE)  | 1101 | 1QVO           | QVPLRPMTYK | 2.22Å  | 24.38  | -192.848 |         |
|     | TVNAHQVLPK (HIP)  | 1101 | 1QVO           | QVPLRPMTYK | 2.22Å  | 25.12  | -192.111 |         |
| P63 | KVFVLLGGCR        | 2402 | 5HGH           | RYPLTFGWCF | 2.39 Å | 37.2   | -208.423 |         |
|     | KVFVLLGGCR        | 3101 | 5WJL(Template) | GTSGSPIVNR | 3.15Å  | 36.61  | -189.256 |         |
| P93 | RLKVFLVGG         | 2402 | 4F7M           | LYASPQLEGF | 2.4 Å  | -16.37 | -214.286 |         |
|     | RLKVFLVGG         | 3001 | 6JIW           | AIFQSSMTK  | 1.5 Å  | 24.83  | -195.052 |         |
| P14 | ASPLSSIFSR        | 1101 | 5WJN           | GTSGSPIINR | 2.85Å  | 16.55  | -219.968 |         |
| P15 | KVTKYLPLDK        | 1101 | 1QVO           | QVPLRPMTYK | 2.22Å  | 31.96  | -185.267 |         |
| P13 | SMYPSCCCTK        | 0201 | 1I4F           | GVYDGREHTV | 1.4 Å  | -2.19  | -203.585 | -80.997 |
|     | SMYPSCCCTK        | 1101 | 2HN7           | AIMPARFYPK | 1.6Å   | 18.59  | -194.147 | -64.234 |
|     | SMYPSCCCTK        | 0301 | 3RL2           | QVPLRPMTYK | 2.39 Å | 29.52  | -188.695 | 76.071  |

Note: **Bond Peptide**: The original bond peptide in HLA structure. **Template**: The structure used as template in HLA homologous modelling task. **ΔAffinity**: Change in binding affinity of the specified binding partners. A negative value means that the mutant binds better than the original protein. **Prime Affinity**: The binding affinity between two sets of protein chains. And it was calculated with MM-GBSA in implicit solvent. **Binding Free Energy**: Due to the amino acid

properties of some HBV peptides, we firstly used peptide docking functionality in Biologics and molecular dynamics simulations in Desmond package(Schrodinger 2020-4 release) to get reasonable binding cofomation of HLA molecules and HBV peptides. And then, we used MM-GBSA method calculated the binding free energy. The binding free energy represents the strength of the bond from the perspective of the total energy. In general, more negative the prime affinity, stronger the bond, and greater the energy is required to break a bond. A positive value indicates that bonding cannot occur spontaneously.

Figure S1:

```

      10      20      30      40      50      60      70      80
HBsAg-C (P31868) MGGWSSKPRQCMGTNLSVNPPLGFFPDHQLDPAFGANSNPDWDFNPNKDHWPEANQVGVGTFPGGFTPPHGGLLGWSPQ
HBsAg-A (P31873) .....A...K.....A.....S.
HBsAg-B (Q67926) .....K.....K...E...L..H..N..D..K...A.....
HBsAg-D (P03139) -----Q...TS.....R..T.....T..D..K..A..A..L.....

      90     100     110     120     130     140     150     160
HBsAg-C (P31868) AQGILTTVPAAPPASTNRQSGRQPTPI SPPLRDSHPQAMQWNSTTFHQALLDPRVRLGYLFPAGGSSSGTVNVPVPTTASP
HBsAg-A (P31873) ...T.H...V.....T.....A.Q...Q.....F.....A.NI..H
HBsAg-B (Q67926) ...L.....F.....T.....L.T.Q.S...A..L.....S.AQN.V.A
HBsAg-D (P03139) ...MQ.L..N.....L.....TT...H.....T.Q.....T..

      170     180     190     200     210     220     230     240
HBsAg-C (P31868) ISSIFSRITGDPAPNMENTTSGFLGPLLVLQAGFFLLTRILTI PQSLDSWWTSLNFLGGAPTCPGQNSQSPTS NHSPTSCP
HBsAg-A (P31873) ...S.....L...I.....S.V..L.....
HBsAg-B (Q67926) ...S.K...V...IA..L..H.....S..K.....T.A.....QI.S...C..
HBsAg-D (P03139) .....I...L...I.....TTV.L.....I.....

      250     260     270     280     290     300     310     320
HBsAg-C (P31868) PICPGYRWMCLRRFII FLFILLLLCLIFLLVLLDYQGMPLVPCPLLPGTSTTSTGPKCTCTTPAQGTSMFSCCCTKPSDGN
HBsAg-A (P31873) .....I..ST.....N.....T..
HBsAg-B (Q67926) .....C.....T..ST.....T..
HBsAg-D (P03139) .T.....I..S.....S.R.....I..Y.....

      330     340     350     360     370     380     390     400
HBsAg-C (P31868) CTCIPIPSSWAFARFLWEWASVRF SWLSLLVPFVQWFAGLSPVWLSVIWMMWYWGPSLYNLS PFLPLLPPIFFCLWVYI
HBsAg-A (P31873) .....KY.....V.....I.....
HBsAg-B (Q67926) .....KY..G.....V.....F.....R..M...T.....
HBsAg-D (P03139) .....GK.....A.....V...I.....S.....A..

      10      20      30      40      50      60      70      80
HBeAg-C (P0C6H5) MQLFHLCLII SCSCPVQASKLCLGWLWGMIDIDPYKEFGASVELLSFLPSDFPFSIRDLLDTASALYREALESPHCSPH
HBeAg-A (Q91C37) .....T.....T.....V.....
HBeAg-B (P0C6G7) .....T.....V.....
HBeAg-D (P0C573) .....T.....V.....

      90     100     110     120     130     140     150     160
HBeAg-C (P0C6H5) HTALRQAILCWGELMNLATVWGSNLED PASRELVVSYVNVNMG LKIRQLLWFHISCLTFGRET VLEYLVSFGVWIRTPPA
HBeAg-A (Q91C37) ...ET.....T.....N.....D..N..T.....
HBeAg-B (P0C6G7) .....T.....V.....D...T...F.....I.....
HBeAg-D (P0C573) .....T.....V.....D...T...F.....I.....

      170     180     190     200     210
HBeAg-C (P0C6H5) YRPPNAPILSTLPETTVVRRRGRSPRRRT PPSRRRRSQSPRRRRSQSRESQC
HBeAg-A (Q91C37) .....D.GRSP.RRT.SP..RR.QSP..RR.QSRESQC
HBeAg-B (P0C6G7) .....
HBeAg-D (P0C573) .....

      10      20      30      40      50      60      70      80
HBx-C (P0C686) MAARVCCQLDPARDVLC LRPVGAESRGRPVSGPGLPSPSSSAVPADHGARLSLRGLPVCAFSSAGPCALRFTSARRME
HBx-A (Q91C38) ...LY...SS.....LA..L.A.S...P...S...H.....C..
HBx-B (Q67923) .....LP..L.T..PA.PP...T...H.....
HBx-D (Q9QMI3) ...L.....L.S.S.S.P...T...H.....

      90     100     110     120     130     140     150
HBx-C (P0C686) TTVNAHQVLKPKVLHKRTLGLSAMS TDL EAYFKDCLFKDWEELGEEIRLMVFLGGCRHKLVCSAPACNFF TSA
HBx-A (Q91C38) ...I.....P.....V.....K.....FA.SS.....
HBx-B (Q67923) .....GN.....V.NE.....K.....
HBx-D (Q9QMI3) .....I..I...T.....K.....A.....

```



```

      10      20      30      40      50      60      70      80
HBpol-C (P0C688)  MPLSYQHFRKLLLLDDE--AGPLEEELPRLADEGLNRRVAEDLNGLNLSVSIPTWTHKVGNTGLYSSTVPVFNPEWQTPS
HBpol-A (Q02314)  ..TE..AD..I..
HBpol-B (Q67925)  ..M..E..D..C..Q..
HBpol-D (Q9QMI1)  ..R..S..H..K..T

      90      100     110     120     130     140     150     160
HBpol-C (P0C688)  FPNIHQEDIIINRCQQVVGPLTVNEKRRLKLI MPARFYPNLTKYLPLDKGKIPYYPEHAVNHVFKTRHYLHTLWKAGILY
HBpol-A (Q02314)  ..K..H..A..F..S..T..D..V..Q..
HBpol-B (Q67925)  ..S..VD..K..F..N..V..YI..D..Q..
HBpol-D (Q9QMI1)  ..HQ..K..E..F..Q..F..L..Q..

      170     180     190     200     210     220     230     240
HBpol-C (P0C688)  KRETTRSASFSGSPYSWEQELQHGRLVFPQTSTRHGDESFCSSGILSRSPVGPICRSQLKQSRGLQPPQGSILARGKSG
HBpol-A (Q02314)  ..H..IK..Q..P..S..F..S..H..P..TSQP.
HBpol-B (Q67925)  ..S..D..K..K..P..P..P..S..Q..RK..P..A..Q..GRQQ.
HBpol-D (Q9QMI1)  ..H..K..-----A..HQ..P..P..SSLQ..KHQK..S..H..RQQ.

      250     260     270     280     290     300     310     320
HBpol-C (P0C688)  RSGSIWARVHSTTRRSFGVEPSGSGHIDNSASSASSCLYQSAVRKTAYSHLSTSKRQSSGHAVELHNI PPSCARSQSEG
HBpol-A (Q02314)  ..P..C..GHR..D..H..A..F..SF..S..Q.
HBpol-B (Q67925)  G..R..PSPWGTV..PTH.C..S..H..A..L..GH..F..NSS.F..Q.
HBpol-D (Q9QMI1)  ..W..R..P..A..P..A..TT.F..KSA..S..P..A..PTV..R..DF..L..S..R

      330     340     350     360     370     380     390     400
HBpol-C (P0C688)  PISSCWLLQFRNSEPCSDYCLTHIVNLLLEDWGPCTEHGEHNIRIPRTPARVTTGGVFLVDKPNHNTESRLVDFSQFSRG
HBpol-A (Q02314)  ..VF..TQ..N..S..L..H..A..
HBpol-B (Q67925)  ..VP..E..S..I..R..T..
HBpol-D (Q9QMI1)  ..VFP..K..S..H..A..

      410     420     430     440     450     460     470     480
HBpol-C (P0C688)  STHVSWPKFAVPNLQSLTNLLSSNLSWLSLDVSAAFYHILPHPAAMPHELLVGSGLPRYVARLSSTSRNIN YQHGTMDL
HBpol-A (Q02314)  ..R..I..S..N..IN..N..L..N.
HBpol-B (Q67925)  N..R..L..S..H..IN..N..N.
HBpol-D (Q9QMI1)  NYR..L..S..N..IFDH..N.

      490     500     510     520     530     540     550     560
HBpol-C (P0C688)  HDSCSRNLYVSLLLLYKTFGRKHLHYSHPIILGFRKIPMGVGLSPFLAQFTSAICSVVRRAFP HCLAFSYMDDVVLGAK
HBpol-A (Q02314)  ..Q..M..Y..W..
HBpol-B (Q67925)  ..N..M..Y..
HBpol-D (Q9QMI1)  ..Y..Q..

      570     580     590     600     610     620     630     640
HBpol-C (P0C688)  SVQHLESLFTSITNLLSLGIHLNPHKTKRWGYSLNFMGYVIGSWGTLPQEHIVLKIQCFRKLPVNRPIDW KVCQRIVG
HBpol-A (Q02314)  ..Y..AV..N..D..Q..H..L..
HBpol-B (Q67925)  ..A..YAAV..Q..M..
HBpol-D (Q9QMI1)  ..AV..N..H..S..D..H..L..E..

      650     660     670     680     690     700     710     720
HBpol-C (P0C688)  LLGFAAPFTQCGYPALMPLYACIQSKQAF TFSPTYKAFCKQYLHLYPVARQRSGLCQVFADATPTGWGLAIGQSGMRGT
HBpol-A (Q02314)  ..A..S..MN..P..HQR..E.
HBpol-B (Q67925)  ..A..S..N..P..R..HQR..
HBpol-D (Q9QMI1)  ..Y..MN..M..HQR..

      730     740     750     760     770     780     790     800
HBpol-C (P0C688)  FVAPLPIHTAELLAACFARSRSKAKLIGTDNSVVLRSKYTSFPWLLGCAANWILRGTSFVYVPSALNPADDPSRGRIGLY
HBpol-A (Q02314)  ..Q..T..
HBpol-B (Q67925)  ..S..H..
HBpol-D (Q9QMI1)  ..Q..NIL..C

      810     820     830     840
HBpol-C (P0C688)  RPLLHLFPFRPTTGRASLYAVSPSPSHLFPVRVHFASPLHVAVRPP
HBpol-A (Q02314)  ..R..Y..T..
HBpol-B (Q67925)  ..R..YQ..T..D..D..
HBpol-D (Q9QMI1)  ..R..T..DH..

```

**Figure S1: Homologous analysis of HBsAg, HBeAg, HBx and HBpol proteins from HBV C, A, B, and D genotypes.** The entire amino acid sequences of each protein from different genotypes of HBV were obtained from UniProt database, aligned and used for *in silico* prediction of HBV antigen T cell epitopes presented by HLA-A allotypes.

**Figure S2:**

**A**

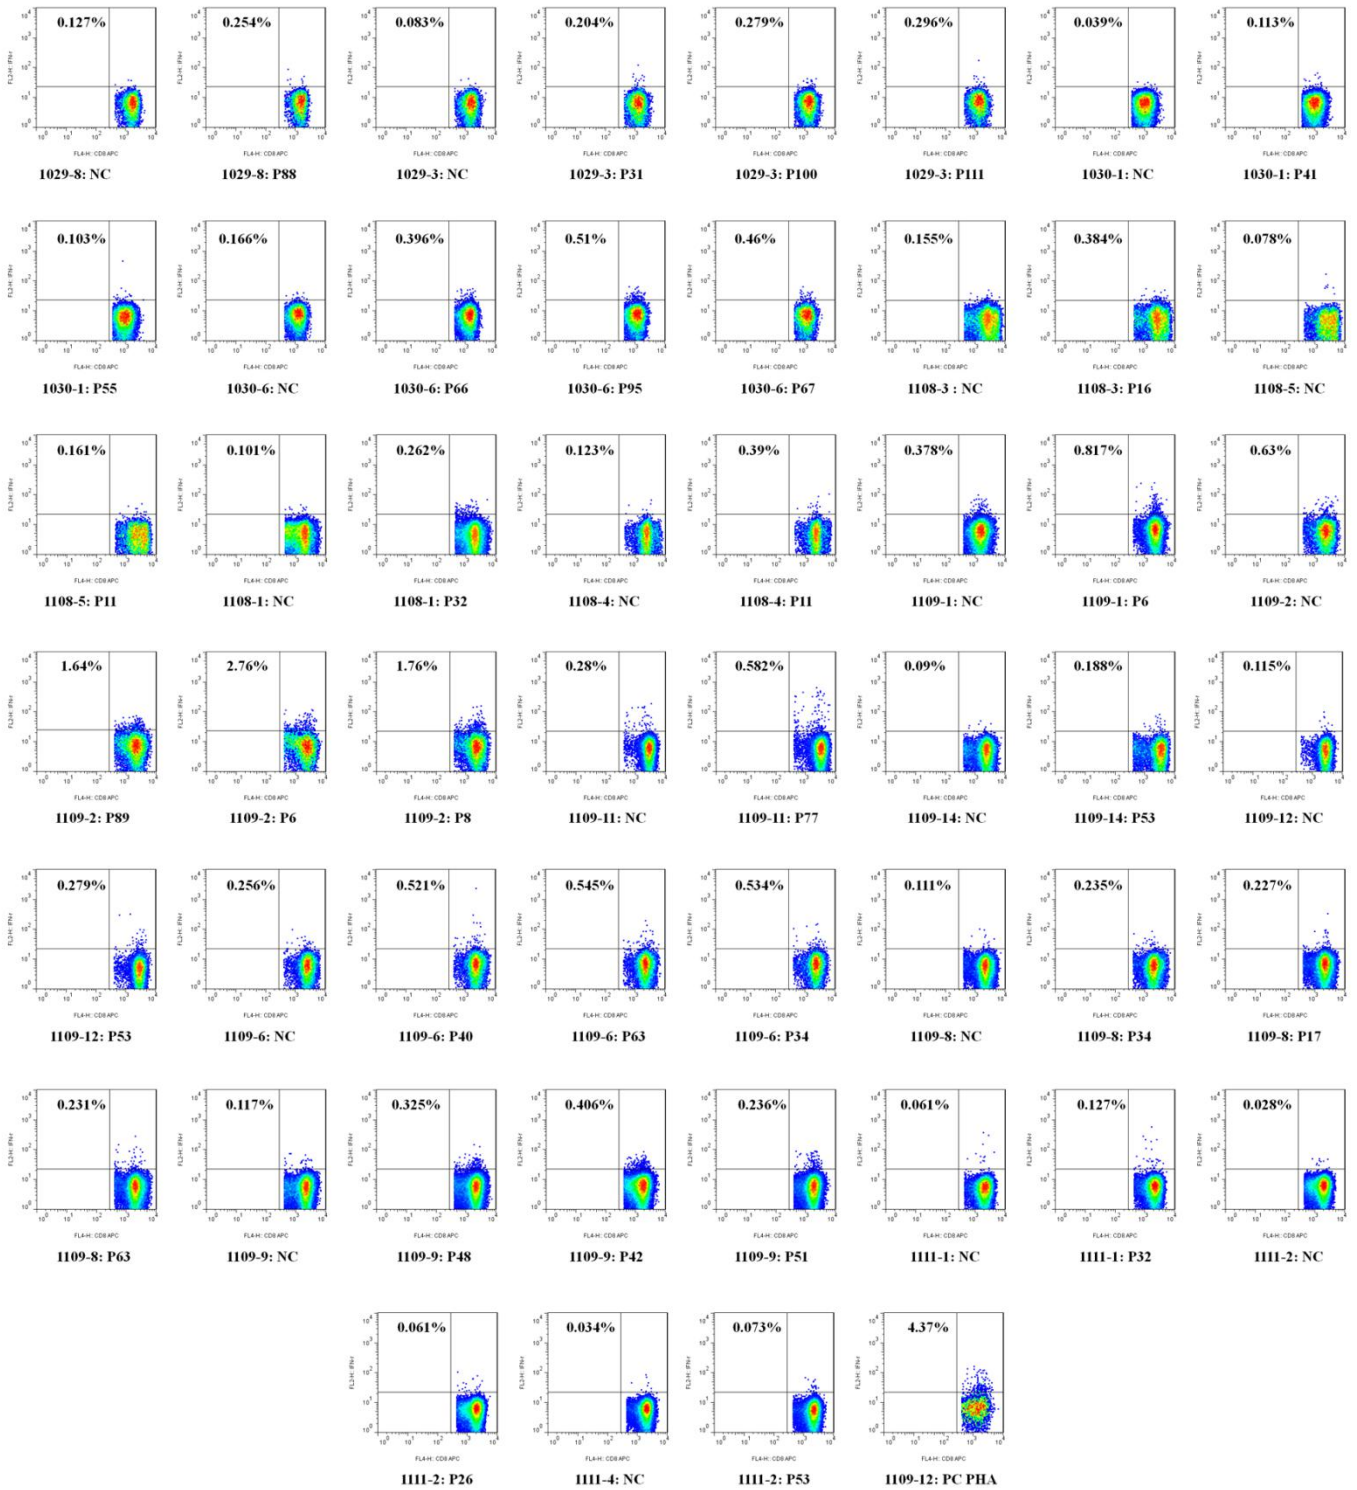

B:

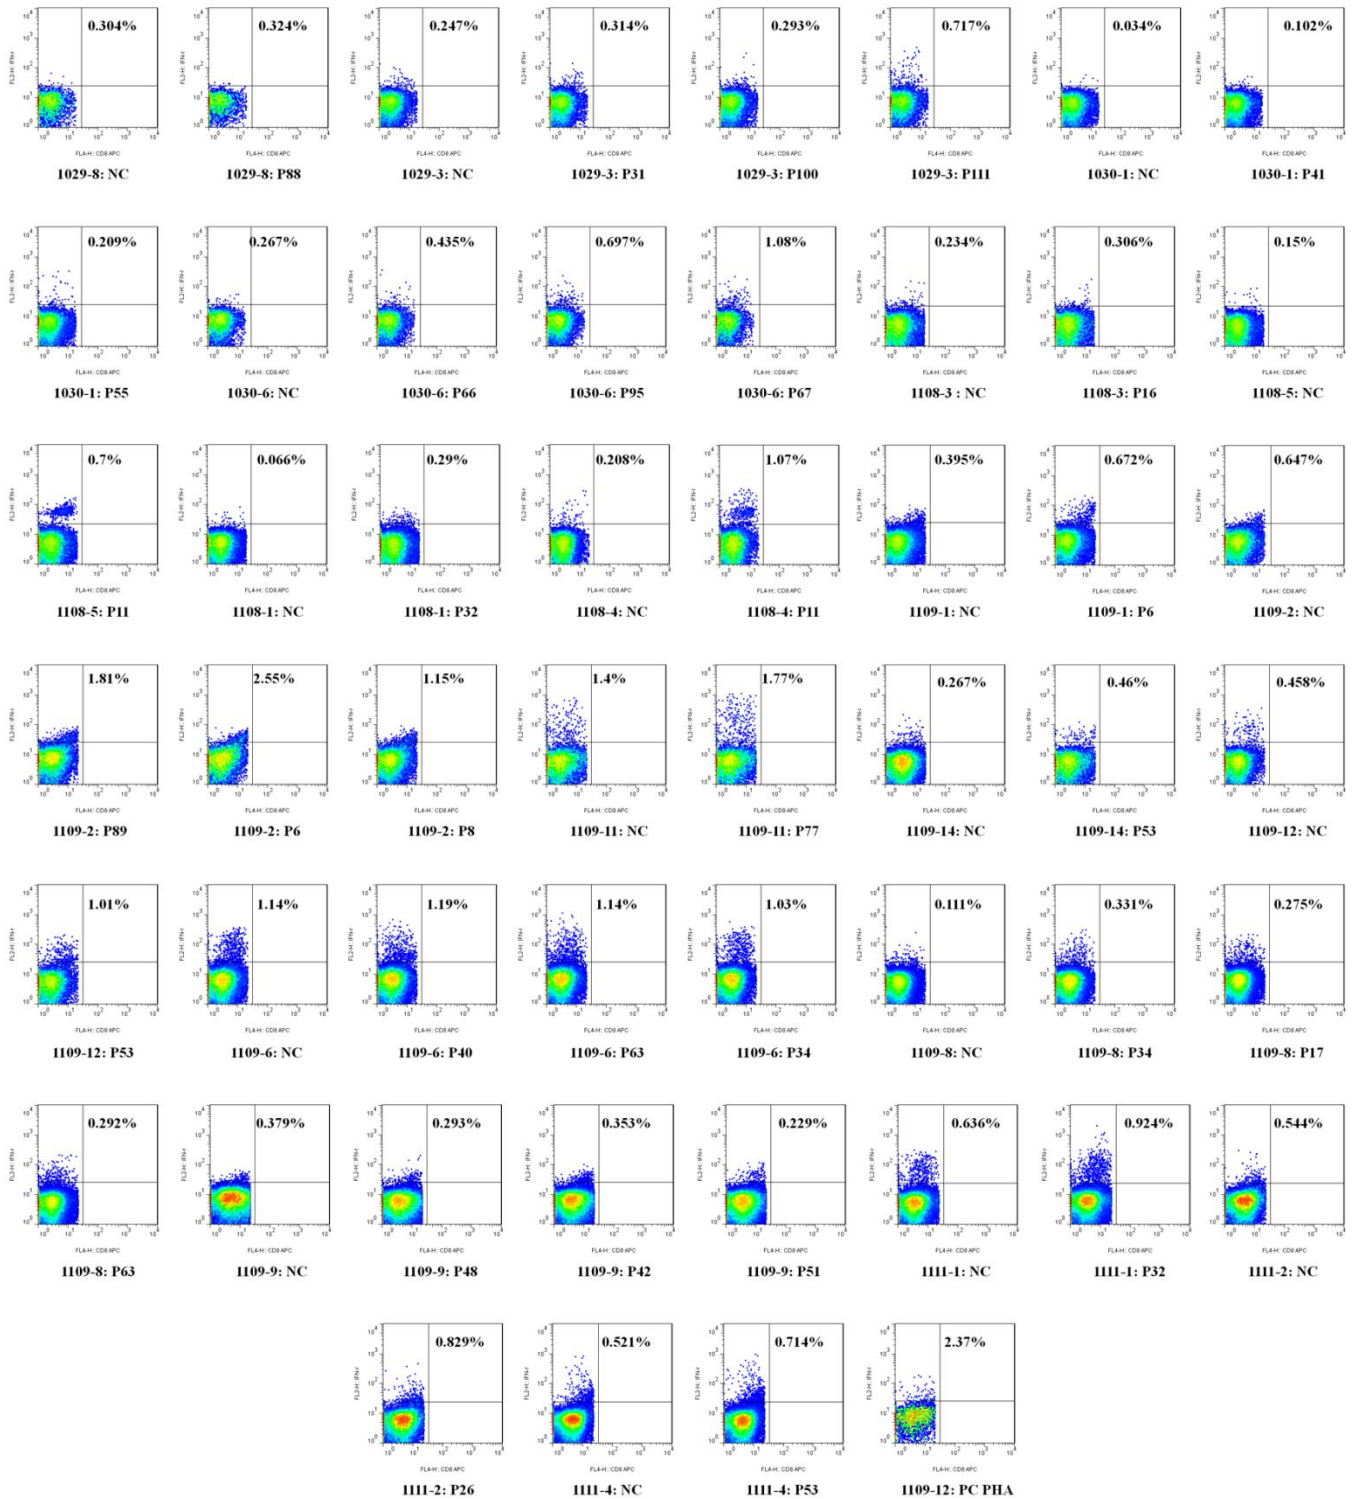

**Figure S2: The validated HBV epitope peptides induced CD8<sup>+</sup> T cell responses in the *in vitro* cocultures with patients' PBMCs. The PBMCs were stimulated with the indicated epitope peptides for seven days *in vitro* and followed by IFN- $\gamma$  intracellular staining. The frequencies of IFN- $\gamma$ <sup>+</sup> cells in CD3<sup>+</sup>/CD8<sup>+</sup> or CD3<sup>+</sup>/CD8<sup>-</sup> populations were analyzed by flow**



cytometry. Totally, 25 epitope peptides were tested using the PBMCs from 19 patients with matching HLA-A alleles. (A) The flow plots of IFN- $\gamma^+$  cells in CD3<sup>+</sup>/CD8<sup>+</sup> T cell population in each coculture. (B) The flow plots of IFN- $\gamma^+$  cells in CD3<sup>+</sup>/CD8<sup>-</sup> T cell population in each coculture.

**Figure S3:**

HBV C genotype-HBsAg

sp | P31868 | :

MGGWSSKPRQGMGTNLSVPNPLGFFPDHQLDPAFGANSNNPDWDFNPNKDHWP EANQVGVGT  
 FPGGFTPPHGGLLGWSPQAQGI LTTVPA APPASTNRQSGRQPTPI SPPLRDSHPQAMQWNS  
 TTFHQALLDPRVRGLYF PAGGSSSGTVN PVPTTASPI SSIFSRTGDPAPNMENITSGFLGPL  
 LVLQAGFFLLTRILTIPQSLDSWWTSLNFLGGAPT CPGQNS QSPTSNSHSPTSCPPI CPGYRW  
 MCLRRFII FLFILLCLIFLLVLLDYQGMLPVCPLLPGTSTTSTGPCKTCTT PAQGTSMFPS  
 CCCTKPSDGNCTCIPIPSSWAFARFLWEWASVRFWSLSLLVPFVQWFA GLSPTVWLSVIWMM  
 WYWGPSLYNII S PFLPLLPIFFCLWVYI

HBV C genotype-HBeAg

sp | P0C6H5 | :

SKLCLGWLWGMDDIPYKEFGASVELLSFLPSDFFPSIRDLLDTASALYREALE SPEHCSPHH  
 TALRQA ILCWGE LMN LATWVGSNLED PASRELVV SYVNVNMGLKIRQLLWFHISCLTFGRET  
 VLEYLV SFGVW

HBV C genotype-HBx

sp | P0C686 | :

MAARVCCQLDEARDVLC LRPVGAESRGRPVSGPFGLPSPSSSAVPADHGARLSLRGLPVCA  
 FSSAGPCALRFTSARME TTVNAHQVLPKVLHKRTLGLSAMSTTDLEAYFKDCLFKDWEELG  
 EEIRLMV FVLGGCRHKLVCSPAPCNFF TSA

HBV C genotype-HBpol

sp | P0C688 | :

MPLSYQHFRK LLLL DDEAGPLEEELPRLADEGLNRRVAEDLNLGNLNVSI PWTHKVGNF TGL  
 YSSTVPVFNP EWQTPSFPNIHLQEDI INRCQQYVGPLTVNEKRRLKLIMPARFYPNLTKYLP  
 LDKGIKPYYPEH AVNHYFKTRHYLHTLWKAGILYKRETT RSASF CGSPYSWEQELQHGRLVF  
 QTS TRHGDESFC SQSSGILSRSPVGP CIRSQLKQSRLGLQPQGS LARGKS GRSGS IWARVH  
 STTRRSFGVEPS GSGHIDNSASSASSCLYQSAVRKTAYSHLSTSKRQSSSGH AVELHNIPPS  
 CAR SQSE GPISS CWWLQFRNSEPCSDYCLTHIVNLL EDWGPCTE HGEHNIRIPRTPARVTGG  
 VFLVDKNPHNTTESRLVVD FSQFSRGSTH VSWPKFAVPNLQSLTNLLSSNLSWLSLDVSAAF

YHIPLHPAAMPHELLVGS SGLP RYVARLSSTSRN INYQHGT MQDLHD SCSRNLVYVSLLLLYKT  
FGRKLHLYSHPI ILGFRKIPMGVGLSPFLLAQFTSAICSVVRRAFPCLAFSYMDDVVLGAK  
SVQHLESFSTS ITNFLSLGIHLN H KTKRWGYSLNFMGYVIGS WGTLPQEHIVL KIKQCFR  
KLPVNRPIDWKVCQRIVGLLGFAAPFTQCGYPALMPYACIQ S KQAFSTFSPTYKAFLCKQYL  
HLYPVARQRS GLCQVFADATPTGWGLAIG QSGMRGT FVAPLPIHTAELLAACFARSRS GAKL  
IGT DNSVLSRKYTSFPWLLGCAANWILRGTSFVYVPSALNPADDPSRGRLGLYRPLL HLPF  
RPTTGRA SLYAVSPSPVSHLP V RVHFASPLHVAWRPP

HBV B genotype-HBsAg

sp | Q67926 |

MGGWSSKPRKMGMTNLSVPNPLGFFPDHQLDPAFKANSE NPDWDLNPHKDNWPD ANKVG VGA  
FGP GFT PPHGGLLGWSPQAQGLLTTVPA A PPPASTNRQS GRQPTP F SPPLRDTHPQAM QWNS  
TTF LQTLQDS RVRALYL PAGGSSSGTVS PAQNTVSAISS ISSK TGDFV PNMENI ASGLLGH L  
LV LQAGFE SLTKILTIPQSLDSWWTSLN FLGTEAC P GQNSQSQISSHSPTCCPPI CPGYRW  
MCLRRFIIFLCILLCLIFLLVLLDYQGMLPVCPL TPGSTTTSTGPCKTCT TPAQGTSMFPS  
CCCTKPTDGNCTCIPSSWAFAYLWG WASVRF SWLSLLVPFVQWVGLSPTVWLSVIWMM  
WFWGPS LYNILR PFMPLLPT FFCLWVYI

HBV B genotype-HBeAg

sp | P0C6G7 |

SKLCLGWLWGMDDIP YKEFGASVELLSFLPSDFFPSIRDLLDTASALYREALSPEHCSPHH  
TALRQAILCWGELMNLATWVGSNLEDPASRELVV S YVNVNMGLKIRQLLWFHISCLTFGRET  
VLEYLVSFGVW

HBV B genotype-HBx

sp | Q67923 |

MAARVCCQLDPARDVLC LRPVGAESRGRPL PGPLG T LPPASP PA VPTDHGAHLSLRGLPVCA  
FSS AGPCAL RFTSARRMETTVNAHG NLPKVLHKRTLGLSAMSTTDLEAYFKDCVFN EWEELG  
EE IRLKVF VLGGCRHKLVC S P APCNFF TSA

HBV B genotype-HBpol

sp | Q67925 |

MPLSYQHFRKMLLLD EE AGPLEEELPRLADE GLNR RVAEDLNLGDL NVSIPWTHKVG NFTGL  
YSSTVPC FNPQ WQTPSFPS IHLQ EDIVDRCK QFVGPLTVNEN RRLKLI MPARFYPNV TKYLP  
LDKGIKPYPEY IVDHYFQTRHYLHTLWKAGILYKREST RSASF CGSPYSWEQ DLQHGRLVF  
QTS KRHGDKS FC PQS P GILP RSSVGP CIQSQRK SRLGP QPA QGQLAG RQGGSGS IRARVH  
PSP WGT VGVPE PS GSGT HNC ASSSSSCLHQSAVRKAAYS LLSTSK GHSSSGH AVELHNFPPNS  
SRFQS QGP VPS CWWLQFRNSE PCSEY CLSH IVNLI EDWGPCTE HGEHR IRTPTPARVTGGV  
FLVDKNPHNTTESRLVVD FSQFSRGN TRVSWPKFAV PNLQSLTNLLSSNLSWLSLDVSAAFY  
HLPLHPAAMPHELLVGS SGLSRYVARLS SH SRINNN QHGT MQNLHNS CSRNLVYVSLMLLYKTY

GRKHLHLYSHPIILGFRKIPMGVGLSPFLLAQFTSAICSVVRRAFPCLAFSYMDDVVLGAKS  
VQHLEALYAAVTNFFLLSLGIHLNPHKTKRWGYSLNFMGYVIGSWGTLPQEHIVQKIKMCFRK  
LPVNRPIDWKVCQRIVGLLGF AAPFTQCGYPALMPYACIQAKQAFTEFSPTYKAFLSKQYLN  
LYPVARQRPGLCQVFRDATPTGWGLAIGHQMRGTFVSPLPIHTAELLAACFARSRSQAKLI  
GTHNSVVLSRKYTSFPWLLGCAANWILRGTSFVYVPSALNPADDPSRGLGLYRPLLRLPYQ  
PTTGRTSLYADSPSVPSHLPDRVHFASPLHVAWRPP

#### HBV A genotype-HBsAg

sp | P31873 |

MGGWSAKPRKGMGTNLSVFNPLGFFPDHQLDPAFGANSNNPDWDFNPNKDHWPEANQVGVGA  
FGPGFTTPHGGLLGSWSQAQGTLHTVPAVPPASTNRQTGRQPTPISPPLRDSHPQAMQWNS  
TAFQQAALQDPRVRGLEFPAGGSSSGTVNFAAPNIASHISSISSRTGDFALNMENITSGFLGPL  
LVLQAGFFLLTRILTIPQSLDSWWTSLNFLGSSPVCLGQNSQSPTSNSHPTSCPPICPGYRW  
MCLRRFIIFLFIILLCLIFLLVLLDYQGMLPVCPLIPGSTTTSTGPCKTCTTPAQNSMFPS  
CCCTKPTDGNCTCIPIPSSWAFAYLWEWASVRFWSLSLLVPFVQWVGLSPTVWLSVIWMM  
WYWGPSLYNILSPFIPLLPIFFCLWVYI

#### HBV A genotype-HBeAg

sp | Q91C37 |

SKLCLGWLWGMIDDPYKEFGATVELLSFLPSDFFPSVRDLLDTASALYREALSPEHCSPH  
TALRETTILCWGELMTLATWVGNLEDPASRDLVVNYVNTNMGLKIRQLLWFHISCLTFGRET  
VLEYLVSFGVW

#### HBV A genotype-HBx

sp | Q91C38 |

MAARLYCQLDSSRDVLCRPVGAESRGRPLAGPLGALSSPSPSAVPSDHGAHLSLRGLPVCA  
FSSAGPCALRFTSARCMETTVNAHQILPKVLHKRTLGLPAMSTTDLEAYFKDCVFKDWEELG  
EEIRLKVFLVGGCRHKLVFAPSSCNFF TSA

#### HBV A genotype-HBpol

sp | Q02314 |

MPLSYQHFRKLLLLDDETEAGPLEEELPRLADA DLNRRVAEDLNLGNLNVSI PWITHKVGNET  
GLYSSTVPIFNPEWQTPSFPKIHLHEDIAANRCQQFVGPLTVNEKRRLKLIMPARFYENSTKY  
LPLDKGIKTYYPDHVVNHYFQTRHYLHTLWKAGILYKRETRSASFSGSPYSWEQELHHGRL  
VIKTSQRHGDEPFCSQPSGILSRSSVGP CIRSQFQKQSRGLQPHQG PLATSQPGRSGSIWAR  
VHSPTRRCFGVEPSGSGHIGHRASDASSCLHQSAVRKAAYSHLSTSKRQSSSGHAVEFHHSFP  
PSSARSQSQGPVFS CWWLQFRNTQPCSNYCLSHLVNLLLEDWGPCTEHGEHHIRIPRTPARVT  
GGVFLVDKNPHNTAESRLVVD FSQFSRGS TRVSWPKFAVPNLQSLTNLLSSNLSWLSLDVSA  
AFYHIPLHPAAMPHELLIGSSGLSRYVARLSSNSRI NNNQHGT LQNLHDSCSRQLYVSLMLLY  
KTYGWKHLHLYSHPIILGFRKIPMGVGLSPFLLAQFTSAICSVVRRAFPCLAFSYMDDVVLG

AKSVQHLESLYTAVTNFLLSLGIHLNPNKTKRWGYSLNFMGYVIGSWGTLPQDHIVQKIKHC  
FRKLPVNRPIDWKVCQRLVGLLGFAAPFTQCGYPALMPYACIQAKQAFTFSPTYKAFLSKQ  
YMNLYPVARQRPGLCQVFADATPTGWGLAIGHQRMRETFVAPLPIHTAELLAACFARSRSGA  
KLLIGTDNSVVLSSQKYTSFPWLLGCTANWILRGTSFVYVPSALNPADDP SRGRLGLYRPLLRL  
PYRPTTGRTSLYAVSPSPVPSHLPV RVHFASPLHVAWRPP

HBV D genotype-HBsAg

sp | P03139 |

MGQNLSTSNPLGFFPDHQLDPAFRANTN NPDWDFNPNKDTWPDANKVGAGAFGLGFTPPHGG  
LLGWSPQAQGI MQTLEANPPPASTNRQSGRQPTPLSPPLRTTHPQAMHWNSTTFHQTLQDPR  
VRGLYFPAGGSSSGTVNPVPTTTSPISSIFSRIGDPALNMENITSGFLGPLLVLQAGFFLLT  
RILTIPQSLDSWWTSLN FLGGT TVCLGQNSQSPI SNHSPTSCPPTCPGYRWMCLRRFIIFLF  
ILLLCLIFLLVLLDYQGMLPVCPLIPGSSTTSTGSCRTCTTPAQGI SMYPSCCCTKPSDGNCL  
TCIPIPSSWAFGKFLWEWASARFSWLSLLVPFVQWFVGLSPI VWLSVIWMMWYWGFS LYSIL  
SPFLPLLPIFFCLWAYI

HBV D genotype-HBeAg

sp | P0C573 |

SKLCLGWLWGMDIDPYKEFGATVELLSFLPS DFFPSVRDLLDTASALYREALE SPEHCSPHH  
TALRQAILCWGE LMTLATWVGVNLEDPA SRDLVVS YVNTN MGLKFRQLLWFHISCLTFGRET  
VIEYLV SFGVW

HBV D genotype-HBx

sp | Q9QMI3 |

MAARLCCQLDPA RDVLC LRPVGAESRGRFVSGPLGSLSSSSPSAVPTDHGAHLSLRGLPVCA  
FSSAGPCALRFTSARRMETTVNAHQI LPKILHKRTLGLST MSTTDLEAYFKDCLFKDWEELG  
EEI RLVKVFVLGGCRHKLVCAAPPCNFFTA

HBV D genotype-HBpol

sp | Q9QMI1 |

MPLSYQHFRRLLLL DDEAGPLEEELPRLADEGLNRRVAEDLNLGNLNVSI PWTHKVGNF TGL  
YSSVVPVFNPHWKTPTFPNIHLHQDI INKCEQFVGPLTVNEKRRLQLIMPARFYPNFTKYLP  
LDKGIKPYYPEHLVNHYFQTRHYLHTLWKAGILYKRETT HSASF CGSPYSWEQKLQHGAESEF  
HQQSPGILSRPPVGS SLQSKHQKSRGLGLOSQGH LARRQGRSWSIRARVHPTARRPFGVEP  
AGSGHTTNFASKSASC SYQSPVRKAA YPTVSTSKR R SSGHAVDFHNLPPSSARSQS ERPVF  
PCWWLQFRNSKPCSDYCLSH IVNLLLEDWGPT EHG EHHIRI PRTPARVTGGVFLVDKNPHNT  
AESRLVVDFSQFSRGNY RVSWPKFAVPNLQSLTNLLSSNLSWLSLDVSAAFYHLPLHPAAMP  
HLLVGSSGLSRYVARLSSNSRIFDHQHGTMQNLHDYCSRNLVVSLLLLLYQTFGRKLHLYSHP  
IILGFRKIPMGVGLSPFLLAQFTSAICSVVRRAFPCLAFSYMDDVVLGAKSVQHLES LFTA  
VTNFLLSLGIHLNPNKTKRWGYSLSHFMGYVIGSWGSLPQDHIVHKLKECFRKL P VNRPIDWK

VCQRIVGLLGF AAPFTQCGYPALMPLYACIQSKQAFTFSPITYKAFLYKQYMNLYPVARQRSGL  
 LCQVFADATPTGWGLAMGHQRMRGTFQAPLPIHTAELLAACFARSRSGANILGTDNSVLSR  
 KYTSFPWLLGCAANWILRGTSFVYVPSALNPADDPSRGLGLCRPLLRLPFRPTTGRTSLYA  
 VSPSVPSHLP<sup>DH</sup>VHFASPLHVAWRPP

**Figure S3: Consensus sequences of HBsAg, HBeAg, HBx and HBpol in different HBV genotypes.** A huge number of sequences of HBsAg, HBeAg, HBx and HBpol in HBV genotype A, B, C and D were collected from HBVdb database. Multiple sequence alignments were performed and analyzed to obtain the conservative regions of these sequences in a genotype-dependent way. The conservative properties of each amino acid in each protein was judged by the threshold of 100%, 95%, 80%, and highlighted the amino acids in different colors (100%: red,  $\geq 95\%$ : yellow,  $\geq 80\%$ : black in gray background, and  $< 80\%$ : black in white background).

**Figure S4:**

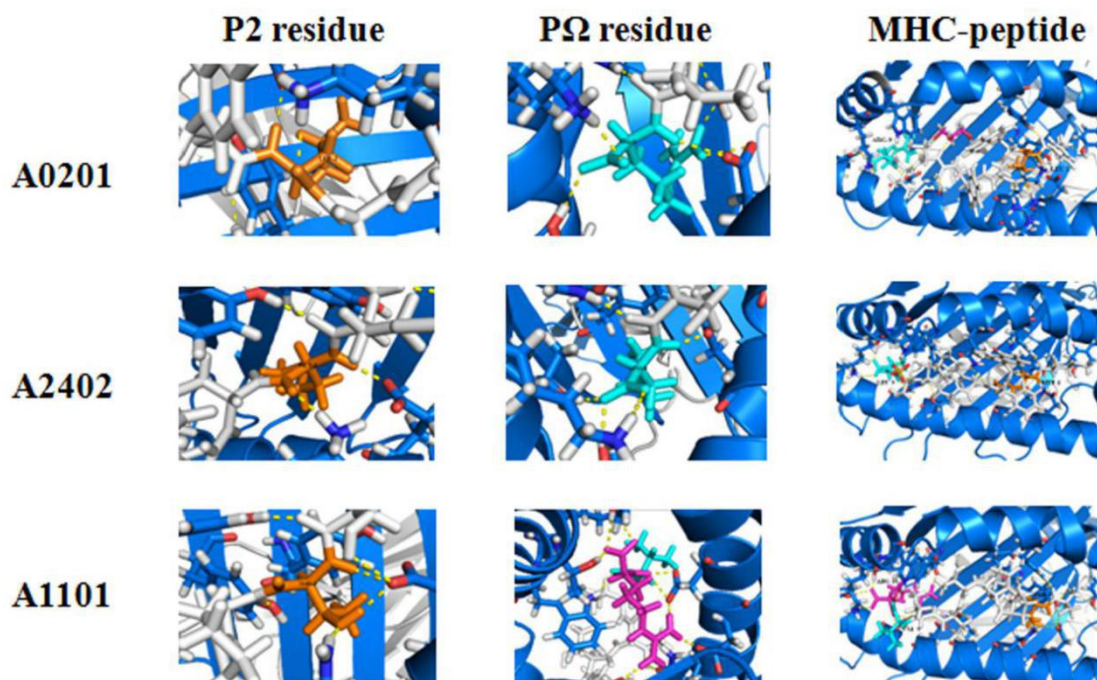

**Figure S4: The binding pattern between the main anchor residues of HBV epitope peptides with HLA-A molecules.** The conformational interaction between P2, P $\Omega$  and the whole length of HBV epitope peptide (FLWEWASVR), (MMWYWGPSL) and (STLPETTVVR) with HLA-A0201 (PDB ID: 5F9J), A2402 (PDB ID: 2BCK) and A1101 (PDB ID: 5WKF), respectively, were displayed in 3D structures of peptide-binding groove of HLA-A molecules.



**Figure S5:**

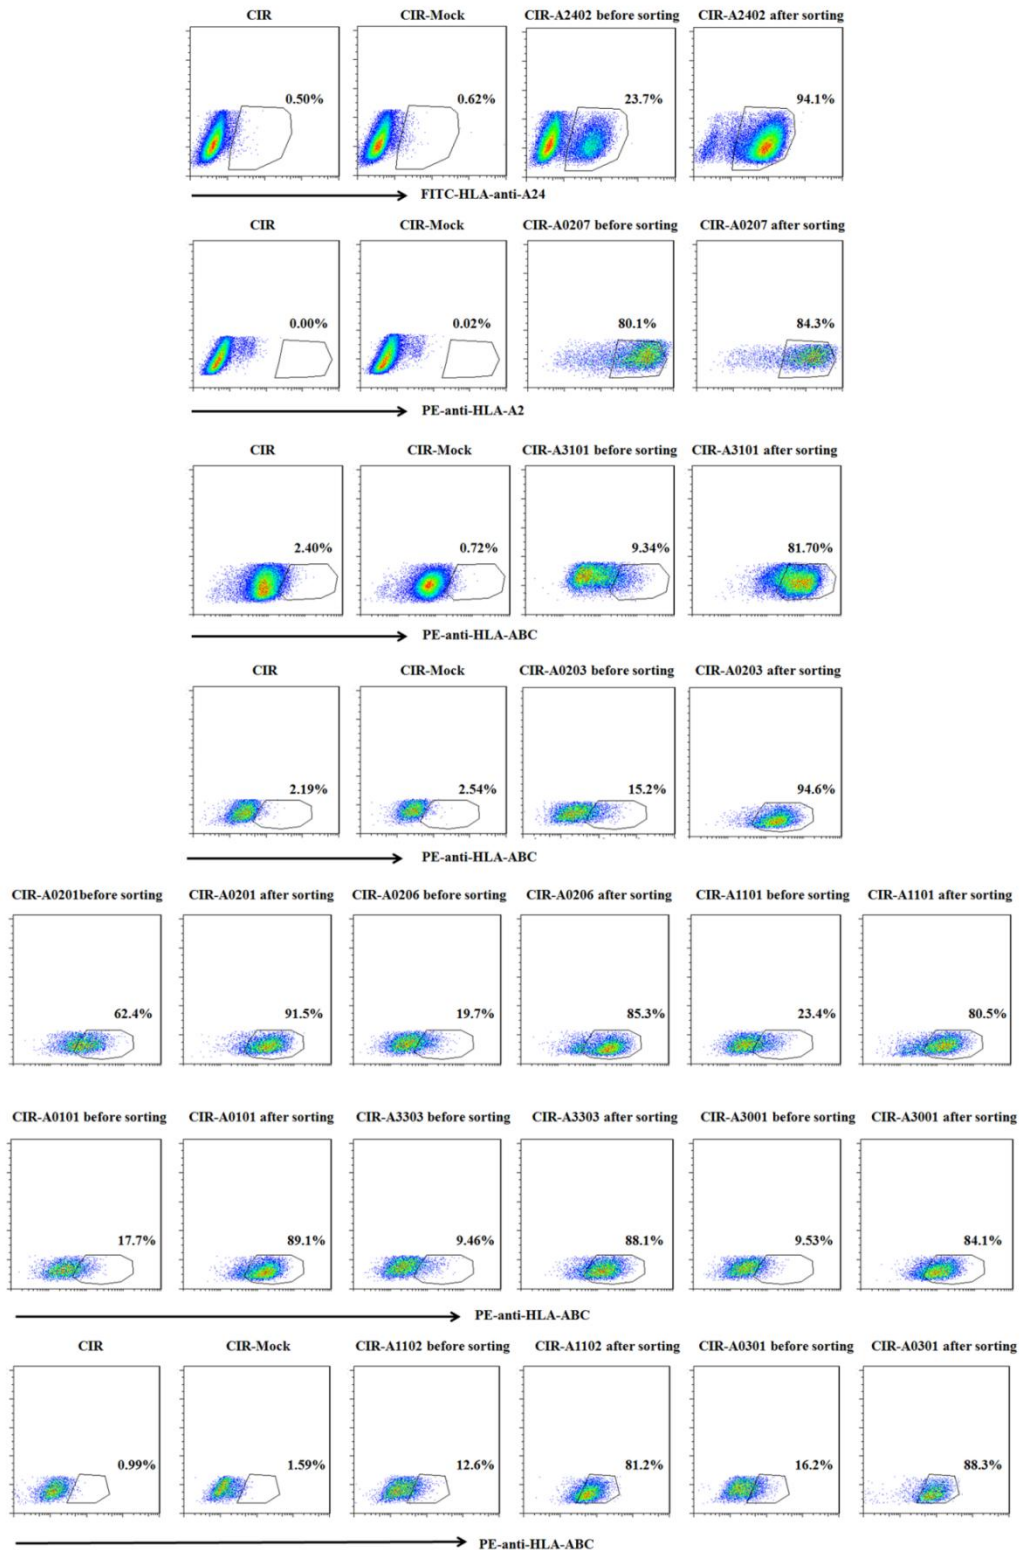

**Figure S5: Hmy2.CIR cell lines expressing indicated HLA-A allotypes.** The transfected Hmy2.1 CIR cell lines expressing HLA-A2402, A0207, A0201, A0203, A0206, A0101, A1101, A3101, A3303, A3001, A1102 or A0301 were generated, respectively, and stained

with FITC-anti-HLA-A24, PE-anti-HLA-A2 or PE-anti-HLA-ABC, then sorted by flow cytometry. The purity of these transfected HMy2.CIR cell lines was 80% to 94% after sorting.

**Figure S6:**

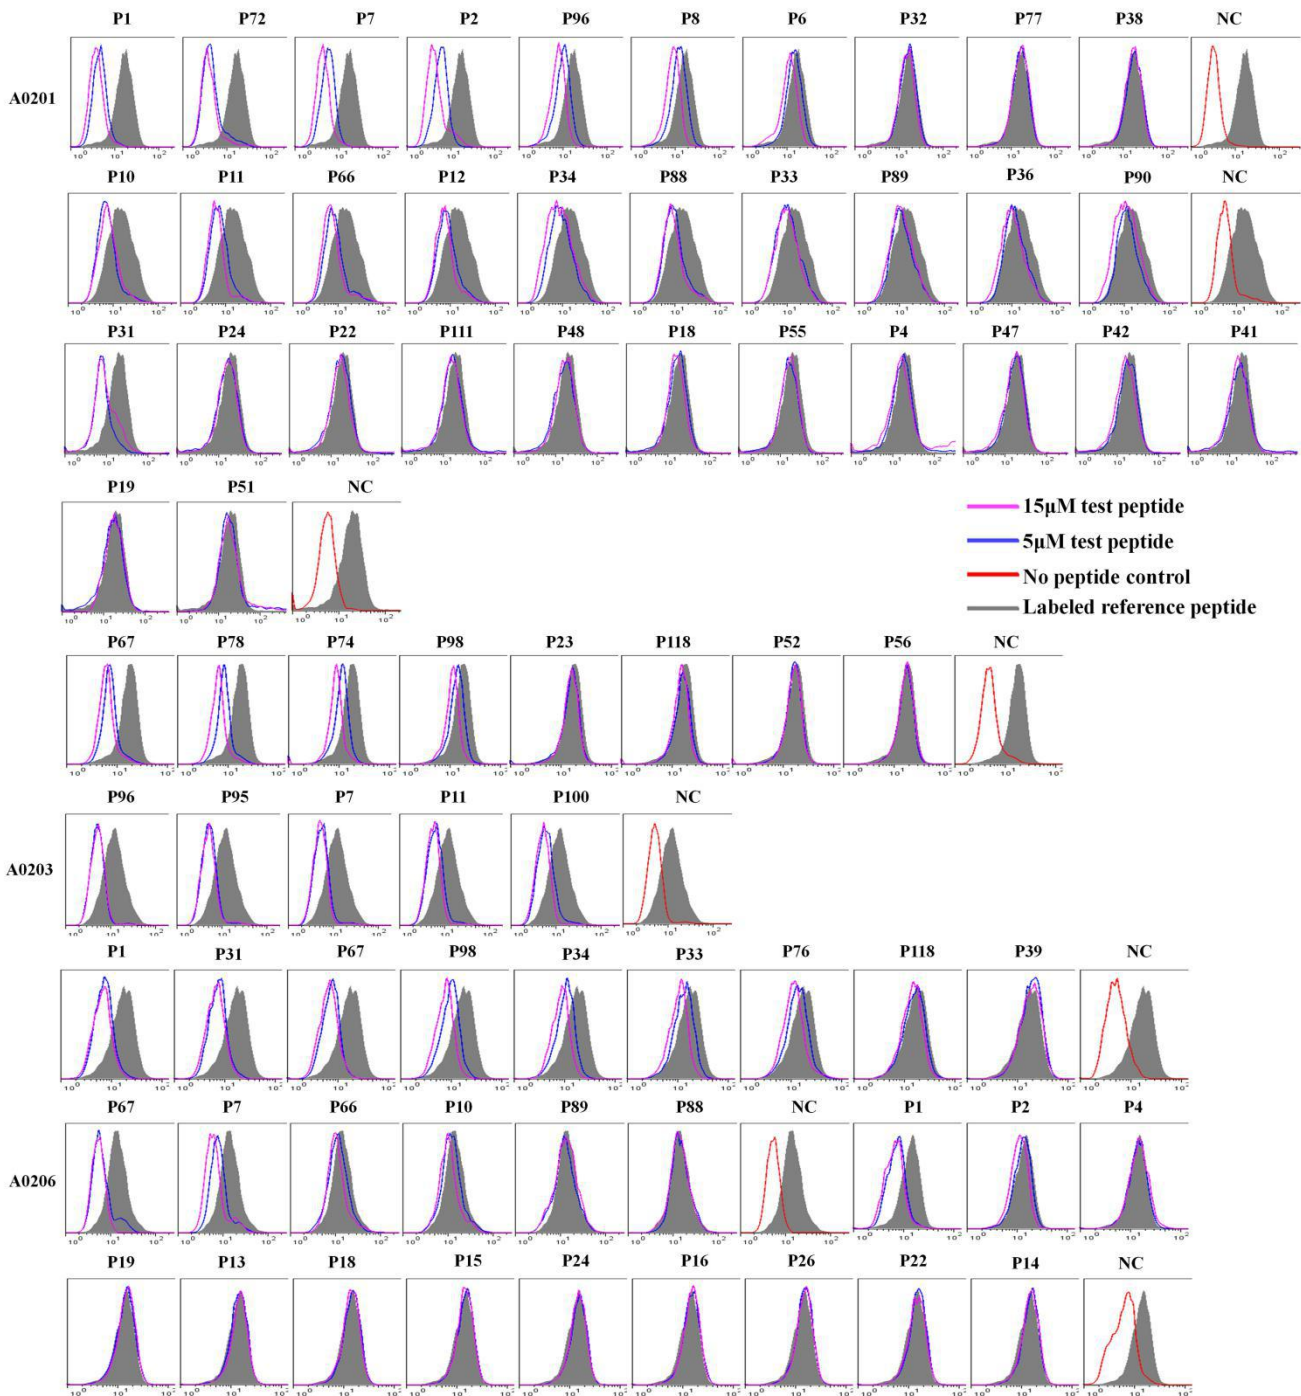

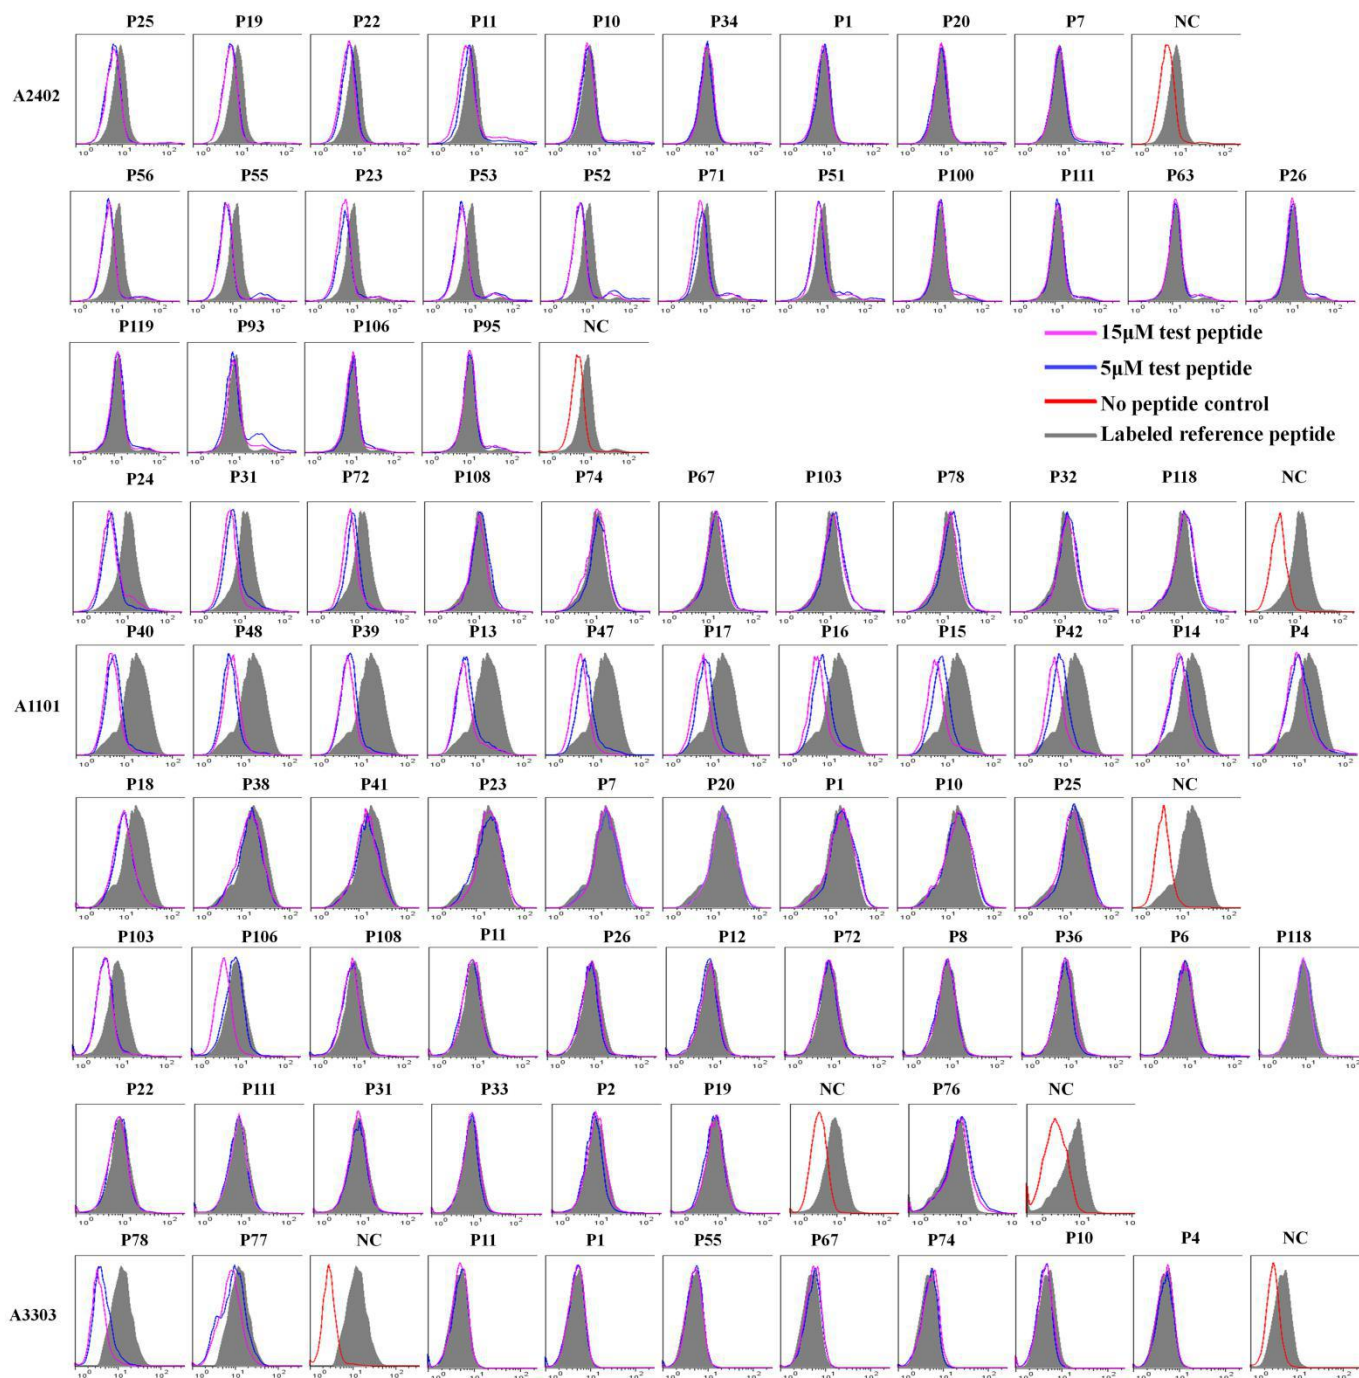



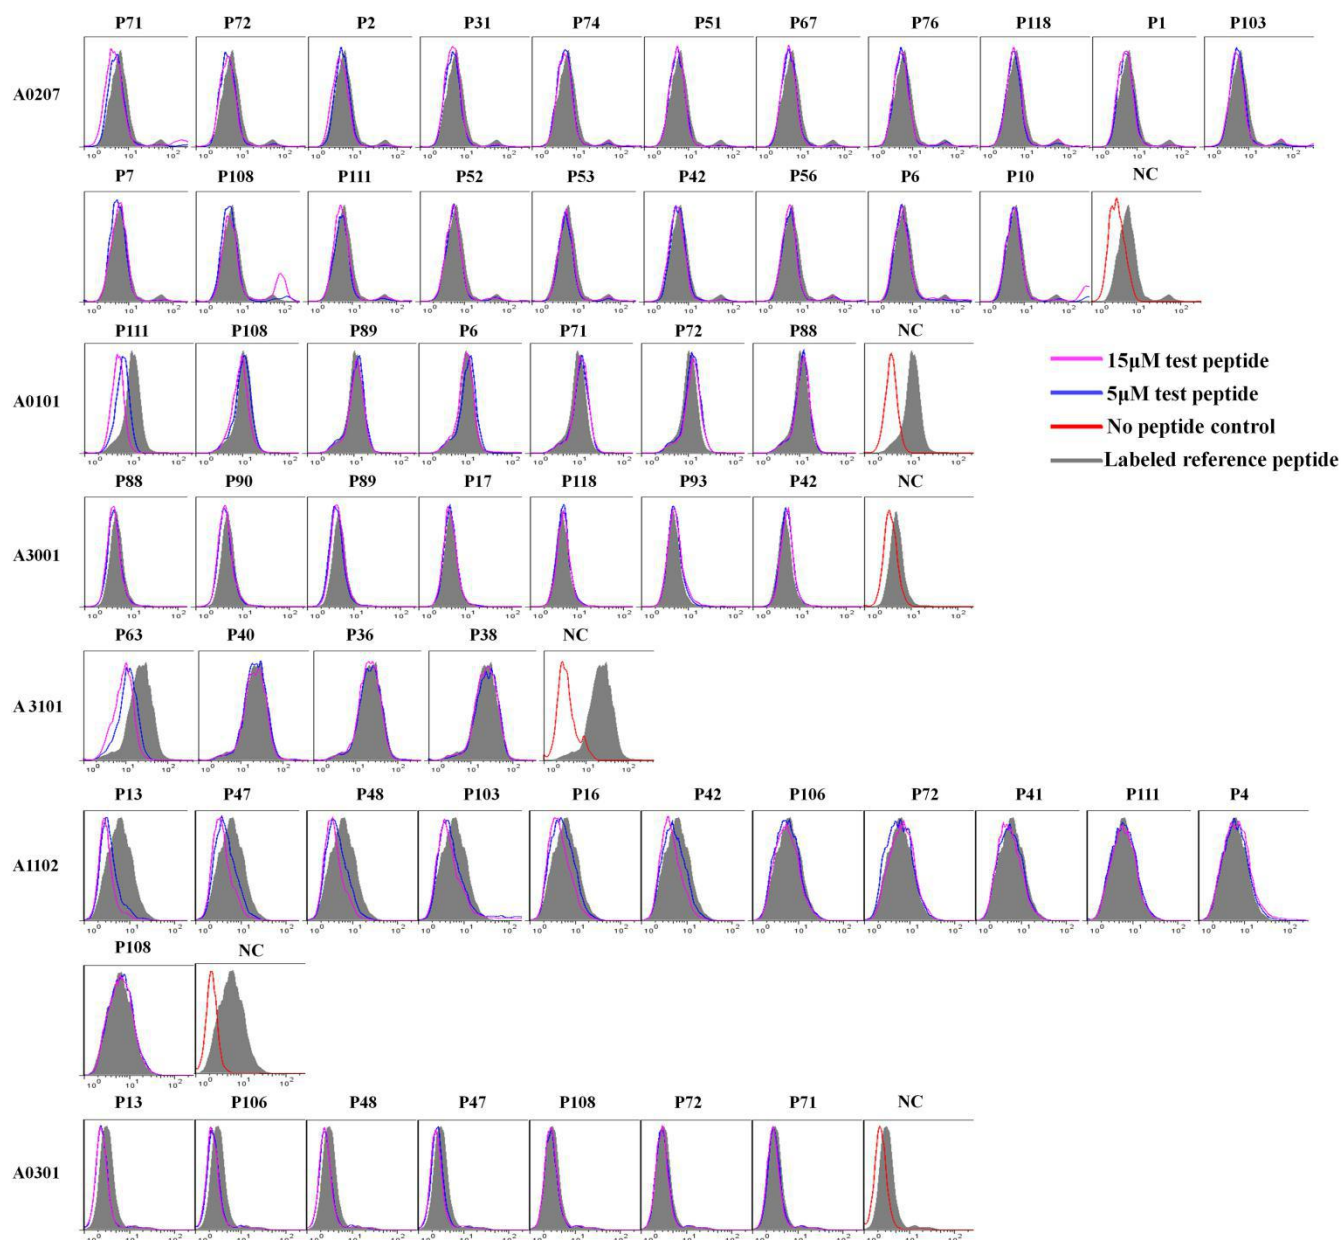

**Figure S6: Binding affinity analysis of 62 validated HBV epitope peptides with corresponding HLA-A allotypes using peptide competitive binding assay.** A series of unlabeled HBV epitope peptides were co-incubated with fluoresce-labeled reference peptides and transfected HMy2.CIR cell lines expressing the indicated HLA-A allotypes. Then the competitively binding (%) of each HBV epitope peptide at 5µM and 15µM was calculated by measuring the percentage of fluorescence-positive HMy2.CIR cells. Blue line and purple line represented the line diagram of cell fluorescence strength under 5µM and 15µM HBV epitope peptide, respectively. Gray filled and red line represented the cell maximal fluorescence (cells with FITC-labeled reference peptide) and negative control (cell background fluorescence with 1640 medium alone), respectively.
